# Supplementary material for: Classification of gene signatures for their information value and functional redundancy
Source: PubMed Central journal article supplement (PMC5736638; doi:10.1038/s41540-017-0038-8), 2017-12-19
Supplement: 41540_2017_38_MOESM1_ESM.pdf [file 41540_2017_38_MOESM1_ESM.pdf]

## Supplementary Information

### Classification of gene signatures for their information value and functional redundancy

Laura Cantini<sup>1</sup>, Laurence Calzone<sup>1</sup>, Loredana Martignetti<sup>1</sup>, Mattias Rydenfelt<sup>2,3</sup>, Nils Blüthgen<sup>2,3</sup>, Emmanuel Barillot<sup>1</sup>, Andrei Zinovyev<sup>1</sup>

1. Institut Curie, PSL Research University, INSERM U900, Mines ParisTech, 26, rue d'Ulm, F-75248 Paris, France.

2. Institute of Pathology, Charite Universitätsmedizin Berlin, Chariteplatz 1, 10117 Berlin, Germany.

3. IRI Life Sciences and Institute for Theoretical Biology, Humboldt University, Philippstr. 13, Haus 18, 10115 Berlin, Germany

Correspondence : Laura Cantini ([laura.cantini@curie.fr](mailto:laura.cantini@curie.fr)) and Andrei Zinovyev ([andrei.zinovyev@curie.fr](mailto:andrei.zinovyev@curie.fr))

### Supplementary contents

**Table S1.** Number of samples available for each transcriptomic dataset used for the analysis.

**Table S2.** List of informative signatures and number of tumors in which they were found significant.

**Figure S1.** Informative vs. Hallmarks GSEA NES score distributions comparison.

**Figure S2.** ROMA activity score on human CD4+ T cell during differentiation plotted on InfoSigMap

**Figure S3.** InfoSigMap profiles are independent from the data source and platform used.

**Table S1. Number of samples available for each transcriptomic dataset used for the analysis**

| <b>tumor code</b> | <b>tumor name extended</b>                                       | <b>number of samples</b> |
|-------------------|------------------------------------------------------------------|--------------------------|
| ACC               | Adrenocortical carcinoma                                         | 78                       |
| BLCA              | Bladder Urothelial Carcinoma                                     | 408                      |
| BRCA              | Breast invasive carcinoma                                        | 1085                     |
| CESC              | Cervical squamous cell carcinoma and endocervical adenocarcinoma | 303                      |
| CHOL              | Cholangiocarcinoma                                               | 36                       |
| COAD              | Colon adenocarcinoma                                             | 276                      |
| DLBC              | Lymphoid Neoplasm Diffuse Large B-cell Lymphoma                  | 48                       |
| ESCA              | Esophageal carcinoma                                             | 182                      |
| GBM               | Glioblastoma multiforme                                          | 155                      |
| HNSC              | Head and Neck squamous cell carcinoma                            | 515                      |
| KICH              | Kidney Chromophobe                                               | 65                       |
| KIRC              | Kidney renal clear cell carcinoma                                | 516                      |
| KIRP              | Kidney renal papillary cell carcinoma                            | 286                      |
| LGG               | Brain Lower Grade Glioma                                         | 513                      |
| LIHC              | Liver hepatocellular carcinoma                                   | 368                      |
| LUAD              | Lung adenocarcinoma                                              | 510                      |
| LUSC              | Lung squamous cell carcinoma                                     | 488                      |
| MESO              | Mesothelioma                                                     | 87                       |
| OV                | Ovarian serous cystadenocarcinoma                                | 302                      |
| PAAD              | Pancreatic adenocarcinoma                                        | 177                      |
| PCPG              | Pheochromocytoma and Paraganglioma                               | 181                      |
| PRAD              | Prostate adenocarcinoma                                          | 494                      |
| READ              | Rectum adenocarcinoma                                            | 90                       |
| SARC              | Sarcoma                                                          | 255                      |
| SKCM              | Skin Cutaneous Melanoma                                          | 103                      |
| STAD              | Stomach adenocarcinoma                                           | 401                      |
| TGCT              | Testicular Germ Cell Tumors                                      | 138                      |
| THCA              | Thyroid carcinoma                                                | 501                      |
| THYM              | Thymoma                                                          | 120                      |
| UCEC              | Uterine Corpus Endometrial Carcinoma                             | 173                      |
| UCS               | Uterine Carcinosarcoma                                           | 57                       |
| UVM               | Uveal Melanoma                                                   | 80                       |

**Table S2. List of informative signatures and number of cancer types in which they were found significant**

| Signature                                                                                                                 | Compendium of origin | Tumors in which is informative | Informative in non-TCGA datasets |
|---------------------------------------------------------------------------------------------------------------------------|----------------------|--------------------------------|----------------------------------|
| REACTOME_RESPIRATORY_ELECTRON_TRANSPORT_ATP_SYNTHESIS_BY_CHEMIOSMOTIC_COUPLING_AND_HEAT_PRODUCTION_BY_UNCOUPLING_PROTEINS | MSigDB C2 CP         | 28                             | 1                                |
| CIT8_UP                                                                                                                   | CIT                  | 27                             | 1                                |
| GNF2_EIF356                                                                                                               | MSigDB C4            | 27                             | 1                                |
| MORF_TPT1                                                                                                                 | MSigDB C4            | 27                             | 1                                |
| CIT8_DN                                                                                                                   | CIT                  | 26                             | 1                                |
| GNF2_CCN2                                                                                                                 | MSigDB C4            | 26                             | 1                                |
| MORF_ACTG1                                                                                                                | MSigDB C4            | 26                             | 1                                |
| REACTOME_RESPIRATORY_ELECTRON_TRANSPORT                                                                                   | MSigDB C2 CP         | 26                             | 1                                |
| CIT7_DN                                                                                                                   | CIT                  | 25                             | 1                                |
| GNF2_BUB1B                                                                                                                | MSigDB C4            | 25                             | 1                                |
| GNF2_CDC20                                                                                                                | MSigDB C4            | 25                             | 1                                |
| GNF2_HMMR                                                                                                                 | MSigDB C4            | 25                             | 1                                |
| GNF2_PCNA                                                                                                                 | MSigDB C4            | 25                             | 1                                |
| GNF2_ST13                                                                                                                 | MSigDB C4            | 25                             | 1                                |
| KOBAYASHI_EGFR_SIGNALING_6HR                                                                                              | MSigDB C2 CGP        | 25                             | 1                                |
| MORF_NPM1                                                                                                                 | MSigDB C4            | 25                             | 1                                |
| chrY11                                                                                                                    | MSigDB C1            | 24                             | 1                                |
| GCM_NPM1                                                                                                                  | MSigDB C4            | 24                             | 1                                |
| GNF2_CCN2                                                                                                                 | MSigDB C4            | 24                             | 1                                |
| GNF2_FBL                                                                                                                  | MSigDB C4            | 24                             | 1                                |
| GNF2_GLTSCR2                                                                                                              | MSigDB C4            | 24                             | 1                                |
| GNF2_RRM2                                                                                                                 | MSigDB C4            | 24                             | 1                                |
| HALLMARK_ALLOGRAFT_REJECTION                                                                                              | MSigDB H             | 24                             | 1                                |
| MORF_NME2                                                                                                                 | MSigDB C4            | 24                             | 1                                |
| FARMER_BREAST_CANCER_CLUSTER_2                                                                                            | MSigDB C2 CGP        | 23                             | 1                                |
| GNF2_CASP1                                                                                                                | MSigDB C4            | 23                             | 1                                |
| GNF2_CDP7                                                                                                                 | MSigDB C4            | 23                             | 1                                |
| GNF2_CENPE                                                                                                                | MSigDB C4            | 23                             | 1                                |
| GNF2_MCM4                                                                                                                 | MSigDB C4            | 23                             | 1                                |
| GNF2_TTK                                                                                                                  | MSigDB C4            | 23                             | 1                                |
| MORF_RAN                                                                                                                  | MSigDB C4            | 23                             | 1                                |
| GCM_TPT1                                                                                                                  | MSigDB C4            | 22                             | 1                                |
| GNF2_CDC2                                                                                                                 | MSigDB C4            | 22                             | 1                                |
| GNF2_CKS2                                                                                                                 | MSigDB C4            | 22                             | 1                                |
| GNF2_FEN1                                                                                                                 | MSigDB C4            | 22                             | 1                                |
| MORF_AFP2M1                                                                                                               | MSigDB C4            | 22                             | 1                                |
| MORF_GPK4                                                                                                                 | MSigDB C4            | 22                             | 1                                |
| REACTOME_METABOLISM_OF_MRNA                                                                                               | MSigDB C2 CP         | 22                             | 1                                |
| REACTOME_METABOLISM_OF_RNA                                                                                                | MSigDB C2 CP         | 22                             | 1                                |
| MODULE_22                                                                                                                 | MSigDB C4            | 21                             | 0                                |
| GNF2_BUB1                                                                                                                 | MSigDB C4            | 21                             | 1                                |
| GNF2_DAP3                                                                                                                 | MSigDB C4            | 21                             | 1                                |
| GNF2_HCK                                                                                                                  | MSigDB C4            | 21                             | 1                                |
| GNF2_MK167                                                                                                                | MSigDB C4            | 21                             | 1                                |
| GNF2_S10DA4                                                                                                               | MSigDB C4            | 21                             | 1                                |
| MORF_CSNK2B                                                                                                               | MSigDB C4            | 21                             | 1                                |
| MORF_EIF356                                                                                                               | MSigDB C4            | 21                             | 1                                |
| MORF_ERH1                                                                                                                 | MSigDB C4            | 21                             | 1                                |
| MORF_MAP2K2                                                                                                               | MSigDB C4            | 21                             | 1                                |
| MORF_PPP1CA                                                                                                               | MSigDB C4            | 21                             | 1                                |
| MORF_UBE2I                                                                                                                | MSigDB C4            | 21                             | 1                                |
| GNF2_UBE2I                                                                                                                | MSigDB C4            | 20                             | 0                                |
| CHANG_CYCLING_GENES                                                                                                       | MSigDB C2 CGP        | 20                             | 1                                |
| GNF2_CENPF                                                                                                                | MSigDB C4            | 20                             | 1                                |
| GNF2_RRM1                                                                                                                 | MSigDB C4            | 20                             | 1                                |
| GNF2_SMC4L1                                                                                                               | MSigDB C4            | 20                             | 1                                |
| GNF2_TNFRSF18                                                                                                             | MSigDB C4            | 20                             | 1                                |
| GNF2_TPT1                                                                                                                 | MSigDB C4            | 20                             | 1                                |
| HALLMARK_OXIDATIVE_PHOSPHORYLATION                                                                                        | MSigDB H             | 20                             | 1                                |
| KEGG_ALLOGRAFT_REJECTION                                                                                                  | MSigDB C2 CP         | 20                             | 1                                |
| KEGG_TYPE_1_DIABETES_MELLITUS                                                                                             | MSigDB C2 CP         | 20                             | 1                                |
| MODULE_84                                                                                                                 | MSigDB C4            | 20                             | 1                                |
| MORF_SOD1                                                                                                                 | MSigDB C4            | 20                             | 1                                |
| REACTOME_TRANSLATION                                                                                                      | MSigDB C2 CP         | 20                             | 1                                |
| WALLACE_PROSTATE_CANCER_RACE                                                                                              | MSigDB C2 CGP        | 20                             | 1                                |
| ZHOU_CELL_CYCLE_GENES_IN_IR_RESPONSE_6HR                                                                                  | MSigDB C2 CGP        | 20                             | 1                                |
| MODULE_83                                                                                                                 | MSigDB C4            | 19                             | 1                                |
| GNF2_C51B                                                                                                                 | MSigDB C4            | 19                             | 1                                |
| GNF2_ESP1                                                                                                                 | MSigDB C4            | 19                             | 1                                |
| GNF2_SMC2L1                                                                                                               | MSigDB C4            | 19                             | 1                                |
| KEGG_AUTOIMMUNE_THYROID_DISEASE                                                                                           | MSigDB C2 CP         | 19                             | 1                                |
| KEGG_OXIDATIVE_PHOSPHORYLATION                                                                                            | MSigDB C2 CP         | 19                             | 1                                |
| KONG_E2F1_TARGETS                                                                                                         | MSigDB C2 CGP        | 19                             | 1                                |
| MCLACHLAN_DENTAL_CARIES                                                                                                   | MSigDB C2 CGP        | 19                             | 1                                |
| MODULE_54                                                                                                                 | MSigDB C4            | 19                             | 1                                |
| TURASHVILI_BREAST_CARCINOMA_DUCTAL_VS_LOBULAR                                                                             | MSigDB C2 CGP        | 19                             | 1                                |
| ZHANG_TLX_TARGETS_60HR                                                                                                    | MSigDB C2 CGP        | 19                             | 1                                |
| chrY11                                                                                                                    | MSigDB C1            | 18                             | 0                                |
| HOFMANN_MYELODYSPLASTIC_SYNDROM_RISK                                                                                      | MSigDB C2 CGP        | 18                             | 1                                |
| CIT12_UP                                                                                                                  | CIT                  | 18                             | 1                                |
| CRONQUIST_IL6_DEPRIVATION                                                                                                 | MSigDB C2 CGP        | 18                             | 1                                |
| GCM_ACTG1                                                                                                                 | MSigDB C4            | 18                             | 1                                |
| GCM_CSNK2B                                                                                                                | MSigDB C4            | 18                             | 1                                |
| GNF2_CARD15                                                                                                               | MSigDB C4            | 18                             | 1                                |
| GNF2_ITGB2                                                                                                                | MSigDB C4            | 18                             | 1                                |
| GNF2_PECAM1                                                                                                               | MSigDB C4            | 18                             | 1                                |
| GNF2_PTPN4                                                                                                                | MSigDB C4            | 18                             | 1                                |
| GNF2_RFC3                                                                                                                 | MSigDB C4            | 18                             | 1                                |
| GNF2_RFC4                                                                                                                 | MSigDB C4            | 18                             | 1                                |
| GUTIERREZ_WALDENSTROMS_MACROGLULINEMIA_2                                                                                  | MSigDB C2 CGP        | 18                             | 1                                |
| MODULE_152                                                                                                                | MSigDB C4            | 18                             | 1                                |
| MODULE_62                                                                                                                 | MSigDB C4            | 18                             | 1                                |
| MORF_EIF3S2                                                                                                               | MSigDB C4            | 18                             | 1                                |
| MORF_FBL                                                                                                                  | MSigDB C4            | 18                             | 1                                |
| MORF_G22P1                                                                                                                | MSigDB C4            | 18                             | 1                                |
| REACTOME_3_UTR_MEDIATED_TRANSLATIONAL_REGULATION                                                                          | MSigDB C2 CP         | 18                             | 1                                |
| REACTOME_INFLUENZA_VIRAL_RNA_TRANSCRIPTION_AND_REPLICATION                                                                | MSigDB C2 CP         | 18                             | 1                                |
| REACTOME_SRP_DEPENDENT_COTRANSLATIONAL_PROTEIN_TARGETING_TO_MEMBRANE                                                      | MSigDB C2 CP         | 18                             | 1                                |
| MODULE_91                                                                                                                 | MSigDB C4            | 17                             | 1                                |
| BIOCARTA_CTLA4_PATHWAY                                                                                                    | MSigDB C2 CP         | 17                             | 1                                |
| GNF2_CD1D                                                                                                                 | MSigDB C4            | 17                             | 1                                |
| GNF2_H2AFX                                                                                                                | MSigDB C4            | 17                             | 1                                |
| GNF2_IL2RB                                                                                                                | MSigDB C4            | 17                             | 1                                |
| GSE10325_LUPUS_CD4_TCELL_VS_LUPUS_MYELOID                                                                                 | MSigDB C7            | 17                             | 1                                |
| HALLMARK_E2F_TARGETS                                                                                                      | MSigDB H             | 17                             | 1                                |
| HALLMARK_G2M_CHECKPOINT                                                                                                   | MSigDB H             | 17                             | 1                                |
| HALLMARK_INTERFERON_GAMMA_RESPONSE                                                                                        | MSigDB H             | 17                             | 1                                |
| KEGG_GRAFT_VERSUS_HOST_DISEASE                                                                                            | MSigDB C2 CP         | 17                             | 1                                |
| LEE_DIFFERENTIATING_T_LYMPHOCYTE                                                                                          | MSigDB C2 CGP        | 17                             | 1                                |
| MITOCHONDRIAL_PART                                                                                                        | MSigDB C5            | 17                             | 1                                |
| MORF_AHP32B                                                                                                               | MSigDB C4            | 17                             | 1                                |
| MORF_BUB1                                                                                                                 | MSigDB C4            | 17                             | 1                                |
| MORF_PPP2R4                                                                                                               | MSigDB C4            | 17                             | 1                                |
| MORF_PSMC1                                                                                                                | MSigDB C4            | 17                             | 1                                |
| REACTOME_IMMUNOREGULATORY_INTERACTIONS_BETWEEN_A_LYMPHOID_AND_A_NON_LYMPHOID_CELL                                         | MSigDB C2 CP         | 17                             | 1                                |
| REACTOME_INFLUENZA_LIFE_CYCLE                                                                                             | MSigDB C2 CP         | 17                             | 1                                |
| REACTOME_TCA_CYCLE_AND_RESPIRATORY_ELECTRON_TRANSPORT                                                                     | MSigDB C2 CP         | 17                             | 1                                |
| REACTOME_TCR_SIGNALING                                                                                                    | MSigDB C2 CP         | 17                             | 1                                |
| SCHUETZ_BREAST_CANCER_DUCTAL_INVASIVE                                                                                     | MSigDB C2 CGP        | 17                             | 1                                |
| GSE22886_NAIVE_CD8_TCELL_VS_MONOCYTE                                                                                      | MSigDB C7            | 16                             | 0                                |
| REACTOME_COSTIMULATION_BY_THE_CD28_FAMILY                                                                                 | MSigDB C2 CP         | 16                             | 0                                |

|                                                                                     |               |    |   |
|-------------------------------------------------------------------------------------|---------------|----|---|
| CIT3_UP                                                                             | CIT           | 16 | 1 |
| GCM_APEX1                                                                           | MSigDB C4     | 16 | 1 |
| GNF2_CD97                                                                           | MSigDB C4     | 16 | 1 |
| HALLMARK_EPITHELIAL_MESENCHYMAL_TRANSITION                                          | MSigDB H      | 16 | 1 |
| HALLMARK_INTERFERON_ALPHA_RESPONSE                                                  | MSigDB H      | 16 | 1 |
| KEGG_ANTIGEN_PROCESSING_AND_PRESENTATION                                            | MSigDB C2 CP  | 16 | 1 |
| MODULE_47                                                                           | MSigDB C4     | 16 | 1 |
| MORF_ATOX1                                                                          | MSigDB C4     | 16 | 1 |
| MORF_DAP3                                                                           | MSigDB C4     | 16 | 1 |
| MORF_EIF4A2                                                                         | MSigDB C4     | 16 | 1 |
| REACTOME_MRNA_SPLICING_MINOR_PATHWAY                                                | MSigDB C2 CP  | 16 | 1 |
| REACTOME_NONSENSE_MEDIATED_DECAY_ENHANCED_BY_THE_EXON_JUNCTION_COMPLEX              | MSigDB C2 CP  | 16 | 1 |
| REACTOME_PEPTIDE_CHAIN_ELONGATION                                                   | MSigDB C2 CP  | 16 | 1 |
| TURASHVILI_BREAST_LOBULAR_CARCINOMA_VS_LOBULAR_NORMAL                               | MSigDB C2 CGP | 16 | 1 |
| MODULE_114                                                                          | MSigDB C4     | 15 | 0 |
| MODULE_42                                                                           | MSigDB C4     | 15 | 1 |
| BOSCO_TH1_CYTOTOXIC_MODULE                                                          | MSigDB C2 CGP | 15 | 1 |
| E2F4_TARGETS                                                                        | ACSN          | 15 | 1 |
| GNF2_ICAM3                                                                          | MSigDB C4     | 15 | 1 |
| GNF2_MCL1                                                                           | MSigDB C4     | 15 | 1 |
| GNF2_MYD88                                                                          | MSigDB C4     | 15 | 1 |
| GSE10325_CD4_TCELL_VS_MYELOID                                                       | MSigDB C7     | 15 | 1 |
| GSE10325_LUPUS_CD4_TCELL_VS_LUPUS_BCELL                                             | MSigDB C7     | 15 | 1 |
| GSE22886_NAIVE_CD4_TCELL_VS_MONOCYTE                                                | MSigDB C7     | 15 | 1 |
| KEGG_INTESTINAL_IMMUNE_NETWORK_FOR_IGA_PRODUCTION                                   | MSigDB C2 CP  | 15 | 1 |
| MODULE_151                                                                          | MSigDB C4     | 15 | 1 |
| MORF_HDAC1                                                                          | MSigDB C4     | 15 | 1 |
| REACTOME_G2_M_CHECKPOINTS                                                           | MSigDB C2 CP  | 15 | 1 |
| REACTOME_VIF_MEDIATED_DEGRADATION_OF_APOBEC3G                                       | MSigDB C2 CP  | 15 | 1 |
| RPS14_DN.V1                                                                         | MSigDB C2 CGP | 15 | 1 |
| SHIP1_DLCL_CURED_VS_FATAL                                                           | MSigDB C2 CGP | 15 | 1 |
| CHUNG_BUISTER_CYTOTOXICITY                                                          | MSigDB C2 CGP | 14 | 0 |
| IMMUNE_SYSTEM_PROCESS                                                               | MSigDB C5     | 14 | 1 |
| GNF2_CD33                                                                           | MSigDB C4     | 14 | 1 |
| GNF2_MATK                                                                           | MSigDB C4     | 14 | 1 |
| GNF2_PTPRC                                                                          | MSigDB C4     | 14 | 1 |
| GNF2_ZAP70                                                                          | MSigDB C4     | 14 | 1 |
| GRAHAM_NORMAL_QUIESCENT_VS_NORMAL_DIVIDING                                          | MSigDB C2 CGP | 14 | 1 |
| GSE10325_CD4_TCELL_VS_BCELL                                                         | MSigDB C7     | 14 | 1 |
| MODULE_45                                                                           | MSigDB C4     | 14 | 1 |
| MORF_BUB1B                                                                          | MSigDB C4     | 14 | 1 |
| PID_PLK1_PATHWAY                                                                    | MSigDB C2 CP  | 14 | 1 |
| PID_TCR_PATHWAY                                                                     | MSigDB C2 CP  | 14 | 1 |
| POMEROY_MEDULLOBLASTOMA_DESMOPLASIC_VS_CLASSIC                                      | MSigDB C2 CGP | 14 | 1 |
| PUJA_BREAST_CANCER_LIT_INT_NETWORK                                                  | MSigDB C2 CGP | 14 | 1 |
| SMID_BREAST_CANCER_NORMAL_LIKE                                                      | MSigDB C2 CGP | 14 | 1 |
| SPINDLE                                                                             | MSigDB C5     | 14 | 1 |
| VILIMAS_NOTCH1_TARGETS                                                              | MSigDB C2 CGP | 14 | 1 |
| MODULE_46                                                                           | MSigDB C4     | 13 | 1 |
| MODULE_75                                                                           | MSigDB C4     | 13 | 1 |
| MODULE_77                                                                           | MSigDB C4     | 13 | 1 |
| REACTOME_SCF_BETA_TRCP_MEDIATED_DEGRADATION_OF_EMI1                                 | MSigDB C2 CP  | 13 | 1 |
| GNF2_ITGAL                                                                          | MSigDB C4     | 13 | 1 |
| GNF2_MCMS                                                                           | MSigDB C4     | 13 | 1 |
| GNF2_SELL                                                                           | MSigDB C4     | 13 | 1 |
| GSE10325_BCELL_VS_MYELOID                                                           | MSigDB C7     | 13 | 1 |
| GSE15750_DAY6_VS_DAY10_EFF_CD8_TCELL                                                | MSigDB C7     | 13 | 1 |
| GSE22886_NAIVE_TCELL_VS_MONOCYTE                                                    | MSigDB C7     | 13 | 1 |
| HALLMARK_MYC_TARGETS_V1                                                             | MSigDB H      | 13 | 1 |
| IJSON_SICKLE_CELL_DISEASE                                                           | MSigDB C2 CGP | 13 | 1 |
| KEGG_RIBOSOME                                                                       | MSigDB C2 CP  | 13 | 1 |
| MODULE_292                                                                          | MSigDB C4     | 13 | 1 |
| MODULE_57                                                                           | MSigDB C4     | 13 | 1 |
| MORF_JUND                                                                           | MSigDB C4     | 13 | 1 |
| REACTOME_ACTIVATION_OF_ATR_IN_RESPONSE_TO_REPLICATION_STRESS                        | MSigDB C2 CP  | 13 | 1 |
| REACTOME_CELL_CYCLE_MITOTIC                                                         | MSigDB C2 CP  | 13 | 1 |
| REACTOME_RNA_POL_I_PROMOTER_OPENING                                                 | MSigDB C2 CP  | 13 | 1 |
| WONG_MITOCHONDRIA_GENE_MODULE                                                       | MSigDB C2 CGP | 13 | 1 |
| JAAITINEN_HEMATOPOIETIC_STEM_CELL                                                   | MSigDB C2 CGP | 12 | 1 |
| KOBAYASHI_EGFR_SIGLING_24HR                                                         | MSigDB C2 CGP | 12 | 0 |
| S_CC_PHASE                                                                          | ACSN          | 12 | 0 |
| BIOCARTA_NO2L12_PATHWAY                                                             | MSigDB C2 CP  | 12 | 1 |
| E2F3_TARGETS                                                                        | ACSN          | 12 | 1 |
| GNF2_FGR                                                                            | MSigDB C4     | 12 | 1 |
| GNF2_HLA-C                                                                          | MSigDB C4     | 12 | 1 |
| GSE15750_DAY6_VS_DAY10_TRAFKO_EFF_CD8_TCELL                                         | MSigDB C7     | 12 | 1 |
| M_PHASE                                                                             | MSigDB C5     | 12 | 1 |
| MITOCHONDRIAL_MEMBRANE_PART                                                         | MSigDB C5     | 12 | 1 |
| MORF_DEK                                                                            | MSigDB C4     | 12 | 1 |
| MORF_SKP1A                                                                          | MSigDB C4     | 12 | 1 |
| PID_IL12_2PATHWAY                                                                   | MSigDB C2 CP  | 12 | 1 |
| REACTOME_ACTIVATION_OF_THE_PRE_REPLICATIVE_COMPLEX                                  | MSigDB C2 CP  | 12 | 1 |
| REACTOME_MITOTIC_M_M_G1_PHASES                                                      | MSigDB C2 CP  | 12 | 1 |
| UROSEVIC_RESPONSE_TO_IMIQIMOD                                                       | MSigDB C2 CGP | 12 | 1 |
| CHOI_ATL_CHRONIC_VS_ACUTE                                                           | MSigDB C2 CGP | 11 | 0 |
| DEFENSE_RESPONSE                                                                    | MSigDB C5     | 11 | 0 |
| GAZDA_DIAMOND_BLACKFAN_ANEMIA_PROGENITOR                                            | MSigDB C3     | 11 | 0 |
| GSE11057_PBM_C_VS_MEM_CD4_TCELL                                                     | MSigDB C7     | 11 | 0 |
| HOFFMANN_CLOCK_TARGETS                                                              | MSigDB C2 CGP | 11 | 1 |
| REACTOME_FORMATION_OF_ATP_BY_CHEMOSMOTIC_COUPLING                                   | MSigDB C2 CP  | 11 | 1 |
| T_CELL_ACTIVATION                                                                   | MSigDB C5     | 11 | 1 |
| BILANGES_SERUM_AND_RAPAMYCIN_SENSITIVE_GENES                                        | MSigDB C2 CGP | 11 | 1 |
| FIK_BREAST_CANCER_SDPG_SIGTURE                                                      | MSigDB C2 CGP | 11 | 1 |
| GAURNIER_PSM4_TARGETS                                                               | MSigDB C2 CGP | 11 | 1 |
| GNF2_CD53                                                                           | MSigDB C4     | 11 | 1 |
| GSE40685_TREG_VS_FOXP3_KO_TREG_PRECURSOR                                            | MSigDB C7     | 11 | 1 |
| IMMUNE_RESPONSE                                                                     | MSigDB C5     | 11 | 1 |
| KEGG_PARKINSONS_DISEASE                                                             | MSigDB C2 CP  | 11 | 1 |
| MODULE_171                                                                          | MSigDB C4     | 11 | 1 |
| MORF_BUB3                                                                           | MSigDB C4     | 11 | 1 |
| MORF_CTBP1                                                                          | MSigDB C4     | 11 | 1 |
| MORF_PPP6C                                                                          | MSigDB C4     | 11 | 1 |
| MORF_RAD23A                                                                         | MSigDB C4     | 11 | 1 |
| PID_CD8_TCR_PATHWAY                                                                 | MSigDB C2 CP  | 11 | 1 |
| REACTOME_CDK_MEDIATED_PHOSPHORYLATION_AND_REMOVAL_OF_CDC6                           | MSigDB C2 CP  | 11 | 1 |
| REACTOME_DNA_REPLICATION                                                            | MSigDB C2 CP  | 11 | 1 |
| REACTOME_GENERATION_OF_SECOND_MESSENGER_MOLECULES                                   | MSigDB C2 CP  | 11 | 1 |
| REACTOME_PD1_SIGNALING                                                              | MSigDB C2 CP  | 11 | 1 |
| SA_RESPONSE_TO_IFNG                                                                 | MSigDB C2 CGP | 11 | 1 |
| TURASHVILI_BREAST_NORMAL_DUCTAL_VS_LOBULAR                                          | MSigDB C2 CGP | 11 | 1 |
| ZHAN_MULTIPLE_MYELOMA                                                               | MSigDB C2 CGP | 11 | 1 |
| HALLMARK_INFLAMMATORY_RESPONSE                                                      | MSigDB H      | 10 | 0 |
| ORGANELLAR_RIBOSOME                                                                 | MSigDB C5     | 10 | 1 |
| PID_AURORA_B_PATHWAY                                                                | MSigDB C2 CP  | 10 | 1 |
| PIEPOLI_LG1_TARGETS                                                                 | MSigDB C2 CGP | 10 | 1 |
| RUTELLA_RESPONSE_TO_HGF                                                             | MSigDB C2 CGP | 10 | 0 |
| WEE                                                                                 | ACSN          | 10 | 1 |
| GCM_PPP1CC                                                                          | MSigDB C4     | 10 | 1 |
| GCM_PSM1                                                                            | MSigDB C4     | 10 | 1 |
| GNF2_TNFSF10                                                                        | MSigDB C4     | 10 | 1 |
| GSE19888_ADENOSINE_A3R_INH_PRETREAT_AND_ACT_BY_A3R_VS_TCELL_MEMBRANES_ACT_MAST_CELL | MSigDB C7     | 10 | 1 |
| HOLLEMAN ASPARAGISE_RESISTANCE_ALL                                                  | MSigDB C2 CGP | 10 | 1 |
| ICHIBA_GRAFT_VERSUS_HOST_DISEASE_D7                                                 | MSigDB C2 CGP | 10 | 1 |
| JIANG_HYPOXIA_VIA_VHL                                                               | MSigDB C2 CGP | 10 | 1 |
| KAUFFMANN_MELANOMA_RELAPSE                                                          | MSigDB C2 CGP | 10 | 1 |
| KEGG_CELL_CYCLE                                                                     | MSigDB C2 CP  | 10 | 1 |
| KEGG_SPLICIOSOME                                                                    | MSigDB C2 CP  | 10 | 1 |
| MODULE_158                                                                          | MSigDB C4     | 10 | 1 |

|                                                            |               |    |   |
|------------------------------------------------------------|---------------|----|---|
| MODULE_208                                                 | MSigDB C4     | 10 | 1 |
| MODULE_44                                                  | MSigDB C4     | 10 | 1 |
| MORF_EI24                                                  | MSigDB C4     | 10 | 1 |
| MORF_RAD21                                                 | MSigDB C4     | 10 | 1 |
| MORF_SART1                                                 | MSigDB C4     | 10 | 1 |
| REACTOME_AUTODEGRADATION_OF_THE_E3_UBIQUITIN_LIGASE_COP1   | MSigDB C2 CP  | 10 | 1 |
| REACTOME_MITOTIC_PROMETAPHASE                              | MSigDB C2 CP  | 10 | 1 |
| REACTOME_PHOSPHORYLATION_OF_CD3_AND_TCR_ZETA_CHAINS        | MSigDB C2 CP  | 10 | 1 |
| RUTELLA_RESPONSE_TO_HGF_VS_CSF2R8_AND_IL4                  | MSigDB C2 CGP | 10 | 1 |
| GSE24634_TREG_VS_TCONV_POST_DAY10_IL4_CONVERSION           | MSigDB C7     | 9  | 0 |
| HSIAO_HOUSEKEEPING_GENES                                   | MSigDB C2 CGP | 9  | 1 |
| KEGG_CYTOKINE_CYTOKINE_RECEPTOR_INTERACTION                | MSigDB C2 CP  | 9  | 1 |
| MARSON_FOXP3_TARGETS                                       | MSigDB C2 CGP | 9  | 0 |
| MITOCHONDRIAL_ENVELOPE                                     | MSigDB C5     | 9  | 0 |
| MORF_CCNI                                                  | MSigDB C4     | 9  | 0 |
| QI_PLASMACYTOMA                                            | MSigDB C2 CGP | 9  | 0 |
| REACTOME_DESTABILIZATION_OF_MRNA_BY_AUF1_HNRNP_D0          | MSigDB C2 CP  | 9  | 0 |
| RIBONUCLEOPROTEIN_COMPLEX                                  | MSigDB C5     | 9  | 1 |
| RIBOSOME                                                   | MSigDB C5     | 9  | 1 |
| RUTELLA_RESPONSE_TO_CSF2R8_AND_IL4                         | MSigDB C2 CGP | 9  | 0 |
| BENPORATH_PROLIFERATION                                    | MSigDB C2 CGP | 9  | 1 |
| BOWIE_RESPONSE_TO_EXTRACELLULAR_MATRIX                     | MSigDB C2 CGP | 9  | 1 |
| CROONQUIST_NRAS_SIGLING                                    | MSigDB C2 CGP | 9  | 1 |
| GNF2_CD111                                                 | MSigDB C4     | 9  | 1 |
| GNF2_INPP5D                                                | MSigDB C4     | 9  | 1 |
| GNF2_NPM1                                                  | MSigDB C4     | 9  | 1 |
| GNF2_RAB71                                                 | MSigDB C4     | 9  | 1 |
| GSE10325_LUPUS_BCELL_VS_LUPUS_MYELOID                      | MSigDB C7     | 9  | 1 |
| GSE14415_TCONV_VS_FOXP3_KO_INDUCED_TREG                    | MSigDB C7     | 9  | 1 |
| GSE21063_WT_VS_NFATC1_KO_8H_ANTI_IGM_STIM_BCELL            | MSigDB C7     | 9  | 1 |
| GSE29618_PDC_VS_MDC_DAY7_FLU_VACCINE                       | MSigDB C7     | 9  | 1 |
| GSE37533_PPARG1_FOXP3_VS_FOXP3_TRANSDUCECD4_TCELL          | MSigDB C7     | 9  | 1 |
| HORTON_SREBF_TARGETS                                       | MSigDB C2 CGP | 9  | 1 |
| M_PHASE_OF_MITOTIC_CELL_CYCLE                              | MSigDB C5     | 9  | 1 |
| MITOCHONDRIAL_MEMBRANE                                     | MSigDB C5     | 9  | 1 |
| MITOCHONDRION                                              | MSigDB C5     | 9  | 1 |
| MORF_AP3D1                                                 | MSigDB C4     | 9  | 1 |
| MORF_RAD23B                                                | MSigDB C4     | 9  | 1 |
| REACTOME_CDT1_ASSOCIATION_WITH_THE_CDC6_ORC_ORIGIN_COMPLEX | MSigDB C2 CP  | 9  | 1 |
| REACTOME_DNA_STRAND_ELONGATION                             | MSigDB C2 CP  | 9  | 1 |
| REACTOME_P53_INDEPENDENT_G1_S_DNA_DAMAGE_CHECKPOINT        | MSigDB C2 CP  | 9  | 1 |
| GRAHAM_CML_DIVIDING_VS_NORMAL_DIVIDING                     | MSigDB C2 CGP | 8  | 0 |
| GSE22886_NAIVE_BCELL_VS_NEUTROPHIL                         | MSigDB C7     | 8  | 0 |
| KEGG_HUNTINGTONS_DISEASE                                   | MSigDB C2 CP  | 8  | 1 |
| LI_WILMS_TUMOR_APLASTIC                                    | MSigDB C2 CGP | 8  | 0 |
| LYMPHOCYTE_ACTIVATION                                      | MSigDB C5     | 8  | 0 |
| MITOCHONDRIAL_INNER_MEMBRANE                               | MSigDB C5     | 8  | 0 |
| MITOCHONDRIAL_RESPIRATORY_CHAIN                            | MSigDB C5     | 8  | 0 |
| MODULE_103                                                 | MSigDB C4     | 8  | 0 |
| MODULE_388                                                 | MSigDB C4     | 8  | 1 |
| PID_ATR_PATHWAY                                            | MSigDB C2 CP  | 8  | 1 |
| REACTOME_INTERFERON_ALPHA_BETA_SIGNALING                   | MSigDB C2 CP  | 8  | 0 |
| REACTOME_REGULATION_OF_ORNITHINE_DECARBOXYLASE_ODC         | MSigDB C2 CP  | 8  | 1 |
| REACTOME_SIGNALING_BY_WNT                                  | MSigDB C2 CP  | 8  | 1 |
| YAO_TEMPORAL_RESPONSE_TO_PROGESTERONE_CLUSTER_12           | MSigDB C2 CGP | 8  | 0 |
| BROWNE_INTERFERON_RESPONSIVE_GENES                         | MSigDB C2 CGP | 8  | 1 |
| E2F6_TARGETS                                               | ACSN          | 8  | 1 |
| GNF2_AP3D1                                                 | MSigDB C4     | 8  | 1 |
| GNF2_PA2G4                                                 | MSigDB C4     | 8  | 1 |
| GNF2_PTPN6                                                 | MSigDB C4     | 8  | 1 |
| GNF2_STAT6                                                 | MSigDB C4     | 8  | 1 |
| GSE29618_BCELL_VS_MONOCYTE                                 | MSigDB C7     | 8  | 1 |
| GSE3982_MEMORY_CD4_TCELL_VS_BCELL                          | MSigDB C7     | 8  | 1 |
| KEGG_NATURAL_KILLER_CELL_MEDIATED_CYTOTOXICITY             | MSigDB C2 CP  | 8  | 1 |
| KEGG_PROTEASOME                                            | MSigDB C2 CP  | 8  | 1 |
| MODULE_125                                                 | MSigDB C4     | 8  | 1 |
| MODULE_27                                                  | MSigDB C4     | 8  | 1 |
| MODULE_28                                                  | MSigDB C4     | 8  | 1 |
| MODULE_32                                                  | MSigDB C4     | 8  | 1 |
| MODULE_403                                                 | MSigDB C4     | 8  | 1 |
| MORF_ESP1                                                  | MSigDB C4     | 8  | 1 |
| MORF_PRDX3                                                 | MSigDB C4     | 8  | 1 |
| MORF_PRKAR1A                                               | MSigDB C4     | 8  | 1 |
| MORF_PSMC2                                                 | MSigDB C4     | 8  | 1 |
| MORF_RRM1                                                  | MSigDB C4     | 8  | 1 |
| MORF_XRCC5                                                 | MSigDB C4     | 8  | 1 |
| PICCALUGA_ANGIOIMMUNOBLASTIC_LYMPHOMA                      | MSigDB C2 CGP | 8  | 1 |
| PID_IL12_STAT4_PATHWAY                                     | MSigDB C2 CP  | 8  | 1 |
| REACTOME_MITOCHONDRIAL_PROTEIN_IMPORT                      | MSigDB C2 CP  | 8  | 1 |
| REACTOME_MRNA_SPLICING                                     | MSigDB C2 CP  | 8  | 1 |
| RODWELL_AGING_KIDNEY                                       | MSigDB C2 CGP | 8  | 1 |
| RORIE_TARGETS_OF_EWSR1_FL1_FUSION                          | MSigDB C2 CGP | 8  | 1 |
| WEBER_METHYLATED_LCP_IN_SPERM                              | MSigDB C2 CGP | 8  | 1 |
| BIOCARTA_IL12_PATHWAY                                      | MSigDB C2 CP  | 7  | 0 |
| CIT14_UP                                                   | CIT           | 7  | 0 |
| FULCHER_INFLAMMATORY_RESPONSE_LECTIN_VS_LPS                | MSigDB C2 CGP | 7  | 0 |
| GRADE_METASTASIS                                           | MSigDB C2 CGP | 7  | 0 |
| GSE22140_HEALTHY_VS_ARTHRITIC_GERMFREE_MOUSE_CD4_TCELL     | MSigDB C7     | 7  | 0 |
| KEGG_CELL_ADHESION_MOLECULES_CAMS                          | MSigDB C2 CP  | 7  | 1 |
| MATTIOLI_MULTIPLE_MYELOMA_WITH_14Q32_TRANSLOCATIONS        | MSigDB C2 CGP | 7  | 0 |
| MITOCHONDRIAL_RIBOSOME                                     | MSigDB C5     | 7  | 0 |
| MOLEAR_TARGETS_OF_CCND1_AND_CDK4                           | MSigDB C2 CGP | 7  | 1 |
| MORF_RABSA                                                 | MSigDB C4     | 7  | 0 |
| ONO_AML1_TARGETS                                           | MSigDB C2 CGP | 7  | 1 |
| POSITIVE_REGULATION_OF_IMMUNE_SYSTEM_PROCESS               | MSigDB C5     | 7  | 0 |
| REACTOME_AUTODEGRADATION_OF_CDH1_BY_CDH1_APC_C             | MSigDB C2 CP  | 7  | 0 |
| REACTOME_INTERFERON_GAMMA_SIGNALING                        | MSigDB C2 CP  | 7  | 0 |
| BIOCARTA_PROTEASOME_PATHWAY                                | MSigDB C2 CP  | 7  | 1 |
| CELL_CYCLE_PROCESS                                         | MSigDB C5     | 7  | 1 |
| FUJII_YBK1_TARGETS                                         | MSigDB C2 CGP | 7  | 1 |
| GABRIELY_MIR21_TARGETS                                     | MSigDB C2 CGP | 7  | 1 |
| GNF2_FOS                                                   | MSigDB C4     | 7  | 1 |
| GNF2_G22P1                                                 | MSigDB C4     | 7  | 1 |
| GNF2_MSH2                                                  | MSigDB C4     | 7  | 1 |
| GNF2_RAN                                                   | MSigDB C4     | 7  | 1 |
| GNF2_VAV1                                                  | MSigDB C4     | 7  | 1 |
| GSE13485_CTRL_VS_DAY7_YF17D_VACCINE_PBM                    | MSigDB C7     | 7  | 1 |
| GSE13547_CTRL_VS_ANTI_IGM_STIM_BCELL_12H                   | MSigDB C7     | 7  | 1 |
| GSE14415_INDUCED_VS_NATURAL_TREG                           | MSigDB C7     | 7  | 1 |
| GSE22140_GERMFREE_VS_SPF_MOUSE_CD4_TCELL                   | MSigDB C7     | 7  | 1 |
| GSE29618_MONOCYTES_VS_PDC                                  | MSigDB C7     | 7  | 1 |
| GSE3039_NKT_CELL_VS_ALPHAALPHA_CD8_TCELL                   | MSigDB C7     | 7  | 1 |
| GSE39556_CD8A_DC_VS_NK_CELL_MOUSE_3H_POST_POLYIC_INI_UP    | MSigDB C7     | 7  | 1 |
| GSE42724_NAIVE_BCELL_VS_PLASMABLAST                        | MSigDB C7     | 7  | 1 |
| HALLMARK_TNFA_SIGNALING_VIA_NFKB                           | MSigDB H      | 7  | 1 |
| KEGG_LEISHMANIA_INFECTION                                  | MSigDB C2 CP  | 7  | 1 |
| MITOSIS                                                    | MSigDB C5     | 7  | 1 |
| MITOTIC_CELL_CYCLE                                         | MSigDB C5     | 7  | 1 |
| MODULE_128                                                 | MSigDB C4     | 7  | 1 |
| MODULE_170                                                 | MSigDB C4     | 7  | 1 |
| MODULE_252                                                 | MSigDB C4     | 7  | 1 |
| MODULE_315                                                 | MSigDB C4     | 7  | 1 |
| MODULE_345                                                 | MSigDB C4     | 7  | 1 |
| MORF_FEN1                                                  | MSigDB C4     | 7  | 1 |
| MORF_RFC4                                                  | MSigDB C4     | 7  | 1 |
| MORF_UNG                                                   | MSigDB C4     | 7  | 1 |
| MORI_IMMATURE_B_LYMPHOCYTE                                 | MSigDB C2 CGP | 7  | 1 |
| REACTOME_CELL_CYCLE                                        | MSigDB C2 CP  | 7  | 1 |

|                                                                       |               |   |   |
|-----------------------------------------------------------------------|---------------|---|---|
| REACTOME_G1_S_TRANSITION                                              | MSigDB C2 CP  | 7 | 1 |
| REACTOME_PACKAGING_OF_TELOMERE_ENDS                                   | MSigDB C2 CP  | 7 | 1 |
| STRUCTURAL_CONSTITUENT_OF_RIBOSOME                                    | MSigDB C5     | 7 | 1 |
| AMUNDSON_GAMMA_RADIATION_RESISTANCE                                   | MSigDB C2 CGP | 6 | 0 |
| SOHLAR_MULTIPLE_MYELOMA_PC3                                           | MSigDB C2 CGP | 6 | 0 |
| BROWN_MYELOID_CELL_DEVELOPMENT                                        | MSigDB C2 CGP | 6 | 0 |
| CELL_CYCLE_CHECKPOINT_GO_000075                                       | MSigDB C5     | 6 | 0 |
| chr5q31                                                               | MSigDB C1     | 6 | 0 |
| DIAZ_CHRONIC_MEYLOGENOUS_LEUKEMIA                                     | MSigDB C2 CGP | 6 | 0 |
| GSE14000_UNSTIM_VS_4H_LPS_DC                                          | MSigDB C7     | 6 | 0 |
| GSE21360_NAIVE_VS_QUATERNARY_MEMORY_CD8_TCELL                         | MSigDB C7     | 6 | 0 |
| GSE21360_PRIMARY_VS_TERTIARY_MEMORY_CD8_TCELL                         | MSigDB C7     | 6 | 0 |
| GSE22140_GERMFREE_VS_SPF_ARTHRITIC_MOUSE_CD4_TCELL                    | MSigDB C7     | 6 | 0 |
| GSE29618_BCELL_VS_MDC_DAY7_FLU_VACCINE                                | MSigDB C7     | 6 | 0 |
| GSE29618_MONOCYTE_VS_MDC                                              | MSigDB C7     | 6 | 0 |
| GSE30962_PRIMARY_VS_SECONDARY_ACUTE_LCMV_INF_CD8_TCELL                | MSigDB C7     | 6 | 0 |
| GSE37532_WT_VS_PPARG_KO_VISCERAL_ADIPOSE_TISSUE_TREG                  | MSigDB C7     | 6 | 0 |
| GSE7509_UNSTIM_VS_IFNA_STIM_IMMATURE_DC                               | MSigDB C7     | 6 | 0 |
| HOFFMANN_PRE_BI_TO_LARGE_PRE_BII_LYMPHOCYTE                           | MSigDB C2 CGP | 6 | 1 |
| HONMA_DOCETAXEL_RESISTANCE                                            | MSigDB C2 CGP | 6 | 1 |
| MODULE_307                                                            | MSigDB C4     | 6 | 1 |
| REACTOME_INTERFERON_SIGNALING                                         | MSigDB C2 CP  | 6 | 0 |
| REACTOME_OLFACTORY_SIGNALING_PATHWAY                                  | MSigDB C2 CP  | 6 | 0 |
| STARK_PREFRONTAL_CORTEX_22Q11_DELETION                                | MSigDB C2 CGP | 6 | 1 |
| TSUTSUMI_FBXW8_TARGETS                                                | MSigDB C2 CGP | 6 | 1 |
| ASTASSIOU_CANCER_MESENCHYMAL_TRANSITION_SIGTURE                       | MSigDB C2 CGP | 6 | 1 |
| BIOCARTA_CTL_PATHWAY                                                  | MSigDB C2 CP  | 6 | 1 |
| BIOCARTA_TCYTOTOXIC_PATHWAY                                           | MSigDB C2 CP  | 6 | 1 |
| CELL_CYCLE_PHASE                                                      | MSigDB C5     | 6 | 1 |
| CHROMOSOME                                                            | MSigDB C5     | 6 | 1 |
| DISTECHE_ESCAPED_FROM_X_ACTIVATION                                    | MSigDB C2 CGP | 6 | 1 |
| FERREIRA_EWINGS_SARCOMA_UNSTABLE_VS_STABLE                            | MSigDB C2 CGP | 6 | 1 |
| GNF2_CD14                                                             | MSigDB C4     | 6 | 1 |
| GOLDRATH_ANTIGEN_RESPONSE                                             | MSigDB C2 CGP | 6 | 1 |
| GSE7218_UNSTIM_VS_ANTIGEN_STIM_THROUGH_IGG_BCELL                      | MSigDB C7     | 6 | 1 |
| IL1                                                                   | Speed         | 6 | 1 |
| KEGG_HEMATOPOIETIC_CELL_LINEAGE                                       | MSigDB C2 CP  | 6 | 1 |
| LINDGREN_BLADDER_CANCER_CLUSTER_2B                                    | MSigDB C2 CGP | 6 | 1 |
| MALO_HYPOXIA                                                          | MSigDB C2 CGP | 6 | 1 |
| MODULE_1                                                              | MSigDB C4     | 6 | 1 |
| MODULE_198                                                            | MSigDB C4     | 6 | 1 |
| MODULE_436                                                            | MSigDB C4     | 6 | 1 |
| MODULE_79                                                             | MSigDB C4     | 6 | 1 |
| MOOTHA_HUMAN_MITODB_6_2002                                            | MSigDB C2 CGP | 6 | 1 |
| MORF_AATF                                                             | MSigDB C4     | 6 | 1 |
| MORF_ACP1                                                             | MSigDB C4     | 6 | 1 |
| MORF_GSPT1                                                            | MSigDB C4     | 6 | 1 |
| MORF_HAT1                                                             | MSigDB C4     | 6 | 1 |
| MORF_HDAC2                                                            | MSigDB C4     | 6 | 1 |
| MORF_UBE2N                                                            | MSigDB C4     | 6 | 1 |
| NABA_CORE_MATRISOME                                                   | MSigDB C2 CP  | 6 | 1 |
| REACTOME_G1_S_SPECIFIC_TRANSCRIPTION                                  | MSigDB C2 CP  | 6 | 1 |
| REACTOME_MITOTIC_G1_G1_S_PHASES                                       | MSigDB C2 CP  | 6 | 1 |
| RNA_BINDING                                                           | MSigDB C5     | 6 | 1 |
| SPINDLE_MICROTUBULE                                                   | MSigDB C5     | 6 | 1 |
| DAVICIONI_MOLECULAR_ARMIS_VS_ERMS                                     | MSigDB C2 CGP | 5 | 0 |
| GSE23568_CTRL_TRANSDUCED_VS_WT_CD8_TCELL                              | MSigDB C7     | 5 | 0 |
| GSE29618_MONOCYTE_VS_MDC_DAY7_FLU_VACCINE                             | MSigDB C7     | 5 | 0 |
| GSE37533_PPARG1_FOXP3_VS_PPARG2_FOXP3_TRANSDUCED_CD4_TCELL            | MSigDB C7     | 5 | 0 |
| JAK_STAT                                                              | Speed         | 5 | 1 |
| KEGG_CHEMOKINE_SIGNALING_PATHWAY                                      | MSigDB C2 CP  | 5 | 1 |
| KIM_RESPONSE_TO_TSA_AND_DECITABINE                                    | MSigDB C2 CGP | 5 | 0 |
| KRCTCNMNMANAGC_UNKNOWN                                                | MSigDB C3     | 5 | 0 |
| LEOUR_DENDRITIC_CELL_MATURATION                                       | MSigDB C2 CGP | 5 | 0 |
| MITOCHONDRIAL_LUMEN                                                   | MSigDB C5     | 5 | 0 |
| MITOCHONDRIAL_RESPIRATORY_CHAIN_COMPLEX_I                             | MSigDB C5     | 5 | 0 |
| MODULE_124                                                            | MSigDB C4     | 5 | 0 |
| MODULE_273                                                            | MSigDB C4     | 5 | 1 |
| REACTOME_IMMUNE_SYSTEM                                                | MSigDB C2 CP  | 5 | 0 |
| REACTOME_MEIOSIS                                                      | MSigDB C2 CP  | 5 | 0 |
| REACTOME_METABOLISM_OF_PROTEINS                                       | MSigDB C2 CP  | 5 | 0 |
| REACTOME_RNA_POL_I_RNA_POL_III_AND_MITOCHONDRIAL_TRANSCRIPTION        | MSigDB C2 CP  | 5 | 1 |
| RIBOSOMAL_SUBUNIT                                                     | MSigDB C5     | 5 | 1 |
| TAKEDA_TARGETS_OF_NUP98_HOXA9_FUSION_8D                               | MSigDB C2 CGP | 5 | 1 |
| TLR                                                                   | Speed         | 5 | 0 |
| TNFa                                                                  | Speed         | 5 | 0 |
| BIOCARTA_TCAOPTOSIS_PATHWAY                                           | MSigDB C2 CP  | 5 | 1 |
| BIOCARTA_THELPER_PATHWAY                                              | MSigDB C2 CP  | 5 | 1 |
| CHROMOSOMEPERICENTRIC_REGION                                          | MSigDB C5     | 5 | 1 |
| CLASPER_LYMPHATIC_VESSELS_DURING_METASTASIS                           | MSigDB C2 CGP | 5 | 1 |
| E2F2_TARGETS                                                          | ACSN          | 5 | 1 |
| GCM_PFN1                                                              | MSigDB C4     | 5 | 1 |
| GNF2_N5                                                               | MSigDB C4     | 5 | 1 |
| GNF2_SNRK                                                             | MSigDB C4     | 5 | 1 |
| GNF2_XRCC5                                                            | MSigDB C4     | 5 | 1 |
| GRATIAS_RETINOBLASTOMA_16Q24                                          | MSigDB C2 CGP | 5 | 1 |
| GSE13547_2H_VS_12_H_ANTI_IGM_STIM_BCELL                               | MSigDB C7     | 5 | 1 |
| GSE14415_NATURAL_TREG_VS_TCONV                                        | MSigDB C7     | 5 | 1 |
| GSE22886_CTRL_VS_LPS_24H_DC                                           | MSigDB C7     | 5 | 1 |
| GSE24634_IL4_VS_CTRL_TREATED_NAIVE_CD4_TCELL_DAY3                     | MSigDB C7     | 5 | 1 |
| GSE24634_TEFF_VS_TCONV_DAY3_IN_CULTURE                                | MSigDB C7     | 5 | 1 |
| GSE25088_WT_VS_STAT6_KO_MACROPHAGE                                    | MSigDB C7     | 5 | 1 |
| GSE29618_PDC_VS_MDC                                                   | MSigDB C7     | 5 | 1 |
| GSE41176_UNSTIM_VS_ANTI_IGM_STIM_BCELL_1H                             | MSigDB C7     | 5 | 1 |
| HALLMARK_MYC_TARGETS_V2                                               | MSigDB H      | 5 | 1 |
| MAPK_PI3K                                                             | Speed         | 5 | 1 |
| MITOCHONDRIAL_MATRIX                                                  | MSigDB C5     | 5 | 1 |
| MORF_DNMT1                                                            | MSigDB C4     | 5 | 1 |
| MORF_GNB1                                                             | MSigDB C4     | 5 | 1 |
| MORF_PCNA                                                             | MSigDB C4     | 5 | 1 |
| MORF_RAC1                                                             | MSigDB C4     | 5 | 1 |
| MORF_USP5                                                             | MSigDB C4     | 5 | 1 |
| REACTOME_E2F_MEDIATED_REGULATION_OF_DNA_REPLICATION                   | MSigDB C2 CP  | 5 | 1 |
| REACTOME_S_PHASE                                                      | MSigDB C2 CP  | 5 | 1 |
| VERHAAK_GLIOMASTOMA_MESENCHYMAL                                       | MSigDB C2 CGP | 5 | 1 |
| ASTON_MAJOR_DEPRESSIVE_DISORDER                                       | MSigDB C2 CGP | 4 | 0 |
| BIOCARTA_NKT_PATHWAY                                                  | MSigDB C2 CP  | 4 | 0 |
| CELLULAR_DEFENSE_RESPONSE                                             | MSigDB C5     | 4 | 0 |
| CIT5_DN                                                               | CIT           | 4 | 0 |
| E2F1_TARGETS                                                          | ACSN          | 4 | 0 |
| FAELT_B_CLL_WITH_VH_REARRANGEMENTS                                    | MSigDB C2 CGP | 4 | 0 |
| GASHIMA_NRG1_SIGLING                                                  | MSigDB C2 CGP | 4 | 0 |
| GNF2_MRD4                                                             | MSigDB C4     | 4 | 0 |
| GRADE_COLON_VS_RECTAL_CANCER                                          | MSigDB C2 CGP | 4 | 0 |
| GSE13484_UNSTIM_VS_YF17D_VACCINE_STIM_PBMIC                           | MSigDB C7     | 4 | 0 |
| GSE1432_1H_VS_24H_IFNG_MICROGLIA                                      | MSigDB C7     | 4 | 0 |
| GSE19198_CTRL_VS_IL21_TREATED_TCELL_6H                                | MSigDB C7     | 4 | 0 |
| GSE22196_HEALTHY_VS_OBESE_MOUSE_SKIN_GAMMADelta_TCELL                 | MSigDB C7     | 4 | 0 |
| GSE23568_ID3_KO_VS_WT_CD8_TCELL                                       | MSigDB C7     | 4 | 0 |
| GSE24142_EARLY_THYMIC_PROGENITOR_VS2_THYMOCTYE_FETAL_UP               | MSigDB C7     | 4 | 0 |
| GSE24634_TEFF_VS_TCONV_DAY7_IN_CULTURE                                | MSigDB C7     | 4 | 0 |
| GSE25085_FETAL_BM_VS_ADULT_BM_SPA_THYMIC_IMPLANT                      | MSigDB C7     | 4 | 0 |
| GSE27241_WT_VS_RORGT_KO_TH17_POLARIZED_CD4_TCELL_TREATED_WITH_DIGOXIN | MSigDB C7     | 4 | 1 |
| GSE29618_BCELL_VS_MDC                                                 | MSigDB C7     | 4 | 1 |
| GSE29618_BCELL_VS_MONOCYTE_DAY7_FLU_VACCINE                           | MSigDB C7     | 4 | 1 |
| GSE29618_MONOCYTE_VS_PDC_DAY7_FLU_VACCINE                             | MSigDB C7     | 4 | 0 |
| GSE42021_TREG_PLN_VS_CD24INT_TREG_THYMUS                              | MSigDB C7     | 4 | 0 |
| GSE7509_UNSTIM_VS_FCGR1B_STIM_DC                                      | MSigDB C7     | 4 | 1 |

|                                                                                                                   |               |   |   |
|-------------------------------------------------------------------------------------------------------------------|---------------|---|---|
| GSE9988_LOW_LPS_VS_VEHICLE_TREATED_MONOCYTE                                                                       | MSigDB_C7     | 4 | 0 |
| GSE9988_LPS_VS_VEHICLE_TREATED_MONOCYTE                                                                           | MSigDB_C7     | 4 | 0 |
| HALLMARK_IL6_JAK_STAT3_SIGNALING                                                                                  | MSigDB_H      | 4 | 0 |
| HALLMARK_CEBPA_TARGETS                                                                                            | MSigDB_C2_CGP | 4 | 0 |
| JACSONNITI_TARGETS                                                                                                | MSigDB_C2_CGP | 4 | 1 |
| KEGG_TOLL_LIKE_RECEPTOR_SIGNALING_PATHWAY                                                                         | MSigDB_C2_CP  | 4 | 1 |
| LEUKOCYTE_ACTIVATION                                                                                              | MSigDB_C5     | 4 | 0 |
| LIU_PROSTATE_CANCER                                                                                               | MSigDB_C2_CGP | 4 | 0 |
| MITOCH_METABOLISM                                                                                                 | ACSN          | 4 | 0 |
| MODULE_169                                                                                                        | MSigDB_C4     | 4 | 0 |
| MODULE_223                                                                                                        | MSigDB_C4     | 4 | 0 |
| MODULE_64                                                                                                         | MSigDB_C4     | 4 | 1 |
| MORF_MTA1                                                                                                         | MSigDB_C4     | 4 | 0 |
| NADH_DEHYDROGENASE_COMPLEX                                                                                        | MSigDB_C5     | 4 | 1 |
| NIKOLSKY_BREAST_CANCER_19P13_AMPUCON                                                                              | MSigDB_C2_CGP | 4 | 1 |
| PID_CDB_TCR_DOWNSTREAM_PATHWAY                                                                                    | MSigDB_C2_CP  | 4 | 1 |
| PID_FOXM1_PATHWAY                                                                                                 | MSigDB_C2_CP  | 4 | 1 |
| REACTOME_MEIOTIC_RECOMBINATION                                                                                    | MSigDB_C2_CP  | 4 | 0 |
| REACTOME_TRANSCRIPTION                                                                                            | MSigDB_C2_CP  | 4 | 1 |
| SENGUPTA_SOPHARYNGEAL_CARCINOMA                                                                                   | MSigDB_C2_CGP | 4 | 1 |
| SPINDLE_CHECKPOINT                                                                                                | MSigDB_C5     | 4 | 1 |
| SPINDLE_POLE                                                                                                      | MSigDB_C5     | 4 | 1 |
| ST_T_CELL_SIGNAL_TRANSDUCTION                                                                                     | MSigDB_C2_CP  | 4 | 1 |
| STAMBOLSKY_RESPONSE_TO_VITAMIN_D3                                                                                 | MSigDB_C2_CGP | 4 | 1 |
| VALK_AML_CLUSTER_4                                                                                                | MSigDB_C2_CGP | 4 | 1 |
| WHITFIELD_CELL_CYCLE_S                                                                                            | MSigDB_C2_CGP | 4 | 1 |
| BIOCARTA_MCM_PATHWAY                                                                                              | MSigDB_C2_CP  | 4 | 1 |
| CAIRO_HEPATOBLASTOMA_CLASSES                                                                                      | MSigDB_C2_CGP | 4 | 1 |
| CHEMELLO_SOLEUS_VS_EDL_MYOFIBERS                                                                                  | MSigDB_C2_CGP | 4 | 1 |
| CIT4_DN                                                                                                           | CIT           | 4 | 1 |
| DACOSTA_UV_RESPONSE_VIA_ERCC3_COMMON                                                                              | MSigDB_C2_CGP | 4 | 1 |
| EXTRACELLULAR_MATRIX                                                                                              | MSigDB_C5     | 4 | 1 |
| GNF2_ANP32B                                                                                                       | MSigDB_C4     | 4 | 1 |
| GNF2_CASP8                                                                                                        | MSigDB_C4     | 4 | 1 |
| GNF2_HAT1                                                                                                         | MSigDB_C4     | 4 | 1 |
| GNF2_PTX3                                                                                                         | MSigDB_C4     | 4 | 1 |
| GSE14000_TRANSLATED_RNA_VS_MRNA_DC                                                                                | MSigDB_C7     | 4 | 1 |
| GSE18791_UNSTIM_VS_NEWCASTLE_VIRUS_DC_6H                                                                          | MSigDB_C7     | 4 | 1 |
| GSE21670_UNTREATED_VS_TGFβ_IL6_TREATED_CD4_TCELL                                                                  | MSigDB_C7     | 4 | 1 |
| GSE24634_TEFF_VS_TCONV_DAY10_IN_CULTURE                                                                           | MSigDB_C7     | 4 | 1 |
| GSE36476_CTRL_VS_TST_ACT_72H_MEMORY_CD4_TCELL_YOUNG                                                               | MSigDB_C7     | 4 | 1 |
| GSE39110_DAY3_VS_DAY6_POST_IMMUNIZATION_CD8_TCELL                                                                 | MSigDB_C7     | 4 | 1 |
| GSE3920_UNTREATED_VS_IFNA_TREATED_ENDOTHELIAL_CELL                                                                | MSigDB_C7     | 4 | 1 |
| GSE41867_NAIVE_VS_DAY30_LCMV_ARMSTRONG_MEMORY_CD8_TCELL                                                           | MSigDB_C7     | 4 | 1 |
| GSE42021_CD24HI_VS_CD24INT_TREG_THYMUS                                                                            | MSigDB_C7     | 4 | 1 |
| KEGG_ASTHMA                                                                                                       | MSigDB_C2_CP  | 4 | 1 |
| KEGG_PRIMARY_IMMUNODEFICIENCY                                                                                     | MSigDB_C2_CP  | 4 | 1 |
| KEGG_T_CELL_RECEPTOR_SIGNALING_PATHWAY                                                                            | MSigDB_C2_CP  | 4 | 1 |
| MODULE_5                                                                                                          | MSigDB_C4     | 4 | 1 |
| MORF_DDB1                                                                                                         | MSigDB_C4     | 4 | 1 |
| MORF_GMP5                                                                                                         | MSigDB_C4     | 4 | 1 |
| MORF_MBD4                                                                                                         | MSigDB_C4     | 4 | 1 |
| MORF_PPP1CC                                                                                                       | MSigDB_C4     | 4 | 1 |
| MORF_PTPN11                                                                                                       | MSigDB_C4     | 4 | 1 |
| MORF_RAB1A                                                                                                        | MSigDB_C4     | 4 | 1 |
| MORI_LARGE_PRE_BII_LYMPHOCYTE                                                                                     | MSigDB_C2_CGP | 4 | 1 |
| PENG_RAPAMYCIN_RESPONSE                                                                                           | MSigDB_C2_CGP | 4 | 1 |
| PID_FANCONI_PATHWAY                                                                                               | MSigDB_C2_CP  | 4 | 1 |
| PROTEINACEOUS_EXTRACELLULAR_MATRIX                                                                                | MSigDB_C5     | 4 | 1 |
| REACTOME_APC_C_CDC20_MEDIATED_DEGRADATION_OF_MITOTIC_PROTEINS                                                     | MSigDB_C2_CP  | 4 | 1 |
| REACTOME_CELL_CYCLE_CHECKPOINTS                                                                                   | MSigDB_C2_CP  | 4 | 1 |
| REACTOME_SMOOTH_MUSCLE_CONTRACTION                                                                                | MSigDB_C2_CP  | 4 | 1 |
| BOYLAN_MULTIPLE_MYELOMA_C_D                                                                                       | MSigDB_C2_CGP | 3 | 0 |
| BURTON_ADIPOGENESIS_7                                                                                             | MSigDB_C2_CGP | 3 | 0 |
| CHNG_MULTIPLE_MYELOMA_HYPERPLOID                                                                                  | MSigDB_C2_CGP | 3 | 0 |
| chr6p22                                                                                                           | MSigDB_C1     | 3 | 0 |
| CIT11_DN                                                                                                          | CIT           | 3 | 0 |
| DING_LUNG_CANCER_MUTATED_FREQUENTLY                                                                               | MSigDB_C2_CGP | 3 | 0 |
| FURUKAWA_DUSP5_TARGETS_PC135                                                                                      | MSigDB_C2_CGP | 3 | 0 |
| GCM_ANP32B                                                                                                        | MSigDB_C4     | 3 | 0 |
| GNF2_TTN                                                                                                          | MSigDB_C4     | 3 | 0 |
| GSE11057_CD4_EFF_MEM_VS_PBMC                                                                                      | MSigDB_C7     | 3 | 0 |
| GSE1432_CTRL_VS_IFNG_24H_MICROGLIA                                                                                | MSigDB_C7     | 3 | 0 |
| GSE1432_CTRL_VS_IFNG_6H_MICROGLIA                                                                                 | MSigDB_C7     | 3 | 0 |
| GSE1460_DP_VS_CD4_THYMOCYTE                                                                                       | MSigDB_C7     | 3 | 0 |
| GSE19198_1H_VS_24H_IL21_TREATED_TCELL                                                                             | MSigDB_C7     | 3 | 0 |
| GSE19401_UNSTIM_VS_RETINOIC_ACID_AND_PAM2CSK4_STIM_FOLLICULAR_DC                                                  | MSigDB_C7     | 3 | 0 |
| GSE21380_NON_TFH_VS_TFH_CD4_TCELL                                                                                 | MSigDB_C7     | 3 | 0 |
| GSE22886_NAIVE_TCELL_VS_DC                                                                                        | MSigDB_C7     | 3 | 0 |
| GSE23568_ID3_TRANSduced_VS_ID3_KO_CD8_TCELL                                                                       | MSigDB_C7     | 3 | 0 |
| GSE24634_IL4_VS_CTRL_TREATED_NAIVE_CD4_TCELL_DAYS                                                                 | MSigDB_C7     | 3 | 0 |
| GSE25085_FETAL_LIVER_VS_ADULT_BM_SP4_THYMIC_IMPLANT                                                               | MSigDB_C7     | 3 | 0 |
| GSE25123_CTRL_VS_ROSIGLITAZONE_STIM_PPARG_KO_MACROPHAGE                                                           | MSigDB_C7     | 3 | 1 |
| GSE3039_CD4_TCELL_VS_B1_BCELL                                                                                     | MSigDB_C7     | 3 | 0 |
| GSE31082_VS_DP_THYMOCYTE                                                                                          | MSigDB_C7     | 3 | 0 |
| GSE34156_NOD2_LIGAND_VS_TLR1_TLR2_LIGAND_6H_TREATED_MONOCYTE                                                      | MSigDB_C7     | 3 | 0 |
| GSE34156_UNTREATED_VS_6H_TLR1_TLR2_LIGAND_TREATED_MONOCYTE                                                        | MSigDB_C7     | 3 | 0 |
| GSE39556_UNTREATED_VS_3H_POLYIC_INJ_MOUSE_CDBA_DC                                                                 | MSigDB_C7     | 3 | 0 |
| GSE44649_NAIVE_VS_ACTIVATED_CD8_TCELL                                                                             | MSigDB_C7     | 3 | 0 |
| GSE45365_NK_CELL_VS_CD11B_DC                                                                                      | MSigDB_C7     | 3 | 0 |
| GSE45365_WT_VS_IFNAR_KO_BCELL                                                                                     | MSigDB_C7     | 3 | 0 |
| GSE45739_UNSTIM_VS_ACD3_ACD28_STIM_NRAS_KO_CD4_TCELL                                                              | MSigDB_C7     | 3 | 0 |
| GSE7219_WT_VS_NIK_NFKB2_KO_DC                                                                                     | MSigDB_C7     | 3 | 1 |
| GSE9006_TYPE_1_VS_TYPE_2_DIABETES_PBMC_AT_DX                                                                      | MSigDB_C7     | 3 | 1 |
| GSE9988_ANTI_TREM1_VS_ANTI_TREM1_AND_LPS_MONOCYTE                                                                 | MSigDB_C7     | 3 | 1 |
| GUO_HEX_TARGETS                                                                                                   | MSigDB_C2_CGP | 3 | 0 |
| HISTONE_ACETYLTRANSFERASE_ACTIVITY                                                                                | MSigDB_C2_CGP | 3 | 0 |
| KIM_ALL_DISORDERS_OLIGODENDROCYTE_NUMBER_CORR                                                                     | MSigDB_C2_CGP | 3 | 0 |
| LI_INDUCED_T_TO_TURAL_KILLER                                                                                      | MSigDB_C2_CGP | 3 | 0 |
| LOCOMOTORY_BEHAVIOR                                                                                               | MSigDB_C5     | 3 | 0 |
| LUI_THYROID_CANCER_PAX8_PPARG                                                                                     | MSigDB_C2_CGP | 3 | 0 |
| MITOTIC_SISTER_CHROMATID_SEGREGATION                                                                              | MSigDB_C5     | 3 | 0 |
| MONTERO_THYROID_CANCER_POOR_SURVIVAL                                                                              | MSigDB_C2_CGP | 3 | 1 |
| MORF_BAG5                                                                                                         | MSigDB_C4     | 3 | 1 |
| OSMAN_BLADDER_CANCER                                                                                              | MSigDB_C2_CGP | 3 | 1 |
| REACTOME_ACTIVATION_OF_NF_KAPPAB_IN_B_CELLS                                                                       | MSigDB_C2_CP  | 3 | 0 |
| REACTOME_APC_C_CDH1_MEDIATED_DEGRADATION_OF_CDC20_AND_OTHER_APC_C_CDH1_TARGETED_PROTEINS_IN_LATE_MITOSIS_EARLY_G1 | MSigDB_C2_CP  | 3 | 0 |
| REACTOME_CYCLIN_A_B1_ASSOCIATED_EVENTS_DURING_G2_M_TRANSITION                                                     | MSigDB_C2_CP  | 3 | 0 |
| REACTOME_CYTOKINE_SIGNALING_IN_IMMUNE_SYSTEM                                                                      | MSigDB_C2_CP  | 3 | 0 |
| REACTOME_IL_3_5_AND_GM-CSF_SIGNALING                                                                              | MSigDB_C2_CP  | 3 | 0 |
| REACTOME_RNA_POL_I_TRANSCRIPTION                                                                                  | MSigDB_C2_CP  | 3 | 1 |
| REACTOME_SCF5XP2_MEDIATED_DEGRADATION_OF_P27_P21                                                                  | MSigDB_C2_CP  | 3 | 1 |
| REACTOME_STRIATED_MUSCLE_CONTRACTION                                                                              | MSigDB_C2_CP  | 3 | 1 |
| REGULATION_OF_IMMUNE_SYSTEM_PROCESS                                                                               | MSigDB_C5     | 3 | 1 |
| REGULATION_OF_MITOSIS                                                                                             | MSigDB_C5     | 3 | 1 |
| RESPIRATORY_CHAIN_COMPLEX_I                                                                                       | MSigDB_C5     | 3 | 1 |
| RHEIN_ALL_GLUCCORTICOID_THERAPY                                                                                   | MSigDB_C2_CGP | 3 | 1 |
| ROETH_TERT_TARGETS                                                                                                | MSigDB_C2_CGP | 3 | 0 |
| TAYLOR_METHYLATED_IN_ACUTE_LYMPHOBLASTIC_LEUKEMIA                                                                 | MSigDB_C2_CGP | 3 | 1 |
| TIEN_INTESTINE_PROBIOTICS_24HR                                                                                    | MSigDB_C2_CGP | 3 | 1 |
| TONKS_TARGETS_OF_RUNX1_RUNX11_FUSION_HSC                                                                          | MSigDB_C2_CGP | 3 | 1 |
| VSNRSF_03                                                                                                         | MSigDB_C3     | 3 | 1 |
| VERHAAK_AML_WITH_NPM1_MUTATED                                                                                     | MSigDB_C2_CGP | 3 | 1 |
| WANG_CLIM2_TARGETS                                                                                                | MSigDB_C2_CGP | 3 | 1 |
| WANG_RESPONSE_TO_GSK3_INHIBITOR_SB216763                                                                          | MSigDB_C2_CGP | 3 | 1 |
| WANG_SMARCE1_TARGETS                                                                                              | MSigDB_C2_CGP | 3 | 1 |
| WUNDER_INFLAMMATORY_RESPONSE_AND_CHOLESTEROL                                                                      | MSigDB_C2_CGP | 3 | 0 |
| ADAPTIVE_IMMUNE_RESPONSE                                                                                          | MSigDB_C5     | 3 | 1 |

|                                                                                                                |               |   |   |
|----------------------------------------------------------------------------------------------------------------|---------------|---|---|
| ADAPTIVE IMMUNE RESPONSE_GO_0002460                                                                            | MSigDB C5     | 3 | 1 |
| BIOCARTA_CSK_PATHWAY                                                                                           | MSigDB C2 CP  | 3 | 1 |
| BIOCARTA_TCR_PATHWAY                                                                                           | MSigDB C2 CP  | 3 | 1 |
| CELL_CYCLE_GO_0007049                                                                                          | MSigDB C5     | 3 | 1 |
| chr16p13                                                                                                       | MSigDB C1     | 3 | 1 |
| CHROMOSOMAL_PART                                                                                               | MSigDB C5     | 3 | 1 |
| DNA_REPLICATION                                                                                                | MSigDB C5     | 3 | 1 |
| FEVR_CTNNB1_TARGETS                                                                                            | MSigDB C2 CGP | 3 | 1 |
| GCM_DFFA                                                                                                       | MSigDB C4     | 3 | 1 |
| GCM_RAB10                                                                                                      | MSigDB C4     | 3 | 1 |
| GCM_UBE2N                                                                                                      | MSigDB C4     | 3 | 1 |
| GINESTIER_BREAST_CANCER_ZNF217_AMPLIFIED                                                                       | MSigDB C2 CGP | 3 | 1 |
| GNF2_MLH1                                                                                                      | MSigDB C4     | 3 | 1 |
| GRAHAM_CML_DIVIDING_VS_NORMAL_QUIESCENT                                                                        | MSigDB C2 CGP | 3 | 1 |
| GSE19485_CTRL_VS_DAY3_4F37D_VACCINE_PBMC                                                                       | MSigDB C7     | 3 | 1 |
| GSE21063_WT_VS_NFATC1_KO_3H_ANTI_ILGM_STIM_BCELL                                                               | MSigDB C7     | 3 | 1 |
| GSE2405_OH_VS_9H_A_PHAGOCYTOPHILUM_STIM_NEUTROPHIL                                                             | MSigDB C7     | 3 | 1 |
| GSE24634_TREG_VS_TCONV_POST_DAY3_IL4_CONVERSION                                                                | MSigDB C7     | 3 | 1 |
| GSE30971_CTRL_VS_LPS_STIM_MACROPHAGE_WBP7_KO_2H                                                                | MSigDB C7     | 3 | 1 |
| GSE36476_CTRL_VS_TSS1_ACT_40H_MEMORY_CD4_TCELL_OLD                                                             | MSigDB C7     | 3 | 1 |
| GSE36476_CTRL_VS_TSS1_ACT_72H_MEMORY_CD4_TCELL_OLD                                                             | MSigDB C7     | 3 | 1 |
| GSE37533_PPARG2_FOXP3_VS_FOXP3_TRANSDUCE_CD4_TCELL                                                             | MSigDB C7     | 3 | 1 |
| GSE42021_TREG_PLN_VS_TREG_PRECURSORS_THYMUS                                                                    | MSigDB C7     | 3 | 1 |
| GSE43863_DAY6_EFF_VS_DAY150_MEM_LY6C_INT_CXCR5POS_CD4_TCELL                                                    | MSigDB C7     | 3 | 1 |
| GSE45837_WT_VS_GF11_KO_PDC                                                                                     | MSigDB C7     | 3 | 1 |
| GSE4984_UNTREATED_VS_GALACTIN1_TREATED_DC                                                                      | MSigDB C7     | 3 | 1 |
| GSE9988_ANTI_TREM1_VS_LOW_LPS_MONOCYTE                                                                         | MSigDB C7     | 3 | 1 |
| HALLMARK_COMPLEMENT                                                                                            | MSigDB H      | 3 | 1 |
| HALLMARK_MYOGENESIS                                                                                            | MSigDB H      | 3 | 1 |
| HELLER_SILENCED_BY_METHYLATION                                                                                 | MSigDB C2 CGP | 3 | 1 |
| JAEGER_METASTASIS                                                                                              | MSigDB C2 CGP | 3 | 1 |
| JECHLINGER_EPITHELIAL_TO_MESENCHYMAL_TRANSITION                                                                | MSigDB C2 CGP | 3 | 1 |
| KAYAMA_SOFT_TISSUE_TUMORS_PCA1                                                                                 | MSigDB C2 CGP | 3 | 1 |
| KEGG_DNA_REPLICATION                                                                                           | MSigDB C2 CP  | 3 | 1 |
| LEE_BMP2_TARGETS                                                                                               | MSigDB C2 CGP | 3 | 1 |
| MITSIDES_RESPONSE_TO_APLIDIN                                                                                   | MSigDB C2 CGP | 3 | 1 |
| MODULE_119                                                                                                     | MSigDB C4     | 3 | 1 |
| MODULE_122                                                                                                     | MSigDB C4     | 3 | 1 |
| MODULE_329                                                                                                     | MSigDB C4     | 3 | 1 |
| MODULE_387                                                                                                     | MSigDB C4     | 3 | 1 |
| MODULE_451                                                                                                     | MSigDB C4     | 3 | 1 |
| MODULE_512                                                                                                     | MSigDB C4     | 3 | 1 |
| MODULE_98                                                                                                      | MSigDB C4     | 3 | 1 |
| MORF_DAP                                                                                                       | MSigDB C4     | 3 | 1 |
| MORF_MSH2                                                                                                      | MSigDB C4     | 3 | 1 |
| MORF_PPP2CA                                                                                                    | MSigDB C4     | 3 | 1 |
| MORF_PRKAG1                                                                                                    | MSigDB C4     | 3 | 1 |
| MORF_PRKDC                                                                                                     | MSigDB C4     | 3 | 1 |
| MORF_RAD54L                                                                                                    | MSigDB C4     | 3 | 1 |
| MORI_PRE_B1_LYMPHOCYTE                                                                                         | MSigDB C2 CGP | 3 | 1 |
| PUJA_BRCA_CENTERED_NETWORK                                                                                     | MSigDB C2 CGP | 3 | 1 |
| RCGANGCGY_VSNR1_Q6                                                                                             | MSigDB C3     | 3 | 1 |
| REACTOME_ACTIVATION_OF_THE_MRNA_UPON_BINDING_OF_THE_CAP_BINDING_COMPLEX_AND_EIF5_AND_SUBSEQUENT_BINDING_TO_43S | MSigDB C2 CP  | 3 | 1 |
| REACTOME_DOWNSTREAM_TCR_SIGNALING                                                                              | MSigDB C2 CP  | 3 | 1 |
| REACTOME_FORMATION_OF_THE_TERNARY_COMPLEX_AND_SUBSEQUENTLY_THE_43S_COMPLEX                                     | MSigDB C2 CP  | 3 | 1 |
| REACTOME_P53_DEPENDENT_G1_DNA_DAMAGE_RESPONSE                                                                  | MSigDB C2 CP  | 3 | 1 |
| REACTOME_PROCESSING_OF_CAPPED_INTRON_CONTAINING_PRE_MRNA                                                       | MSigDB C2 CP  | 3 | 1 |
| REACTOME_REGULATION_OF_APOPTOSIS                                                                               | MSigDB C2 CP  | 3 | 1 |
| REACTOME_TRNA_AMINOACYLATION                                                                                   | MSigDB C2 CP  | 3 | 1 |
| REN_ALVEOLAR_RHABDOMYOSARCOMA                                                                                  | MSigDB C2 CGP | 3 | 1 |
| RICKMAN_TUMOR_DIFFERENTIATED_WELL_VS_POORLY                                                                    | MSigDB C2 CGP | 3 | 1 |
| ROSS_AML_OF_FAB_M7_TYPE                                                                                        | MSigDB C2 CGP | 3 | 1 |
| SCHLOSSER_MYC_AND_SERUM_RESPONSE_SYNERGY                                                                       | MSigDB C2 CGP | 3 | 1 |
| SPICEOSOME                                                                                                     | MSigDB C5     | 3 | 1 |
| STRUCTURAL_CONSTITUENT_OF_MUSCLE                                                                               | MSigDB C5     | 3 | 1 |
| TAKEDA_TARGETS_OF_NUP98_HOXA9_FUSION_10D                                                                       | MSigDB C2 CGP | 3 | 1 |
| VSELK1_Q2                                                                                                      | MSigDB C3     | 3 | 1 |
| VSNR12_Q1                                                                                                      | MSigDB C3     | 3 | 1 |
| VECCI_GASTRIC_CANCER_ADVANCED_VS_EARLY                                                                         | MSigDB C2 CGP | 3 | 1 |
| ACCAATC_MIR_509                                                                                                | MSigDB C3     | 2 | 1 |
| AIGNER_ZEB1_TARGETS                                                                                            | MSigDB C2 CGP | 2 | 0 |
| AMIT_SERUM_RESPONSE_480_MCF10A                                                                                 | MSigDB C2 CGP | 2 | 0 |
| BALDWIN_PRKCI_TARGETS                                                                                          | MSigDB C2 CGP | 2 | 0 |
| BIOCARTA_TH1TH2_PATHWAY                                                                                        | MSigDB C2 CP  | 2 | 0 |
| CAHOY_NEURONAL                                                                                                 | MSigDB C2 CGP | 2 | 0 |
| CAIRO_HEPATOBLASTOMA                                                                                           | MSigDB C2 CGP | 2 | 0 |
| CAR_HPXC                                                                                                       | MSigDB C4     | 2 | 0 |
| CAR_IGFBP1                                                                                                     | MSigDB C4     | 2 | 0 |
| CELL_ACTIVATION                                                                                                | MSigDB C5     | 2 | 0 |
| CHIANG_LIVER_CANCER_SUBCLASS_CTNNB1                                                                            | MSigDB C2 CGP | 2 | 0 |
| CHIBA_RESPONSE_TO_TSA                                                                                          | MSigDB C2 CGP | 2 | 0 |
| chr17q25                                                                                                       | MSigDB C1     | 2 | 0 |
| COLDREN_GEFITINIB_RESISTANCE                                                                                   | MSigDB C2 CGP | 2 | 0 |
| CREIGHTON_AKT1_SIGLING_VIA_MTOR                                                                                | MSigDB C2 CGP | 2 | 0 |
| CUI_TCF21_TARGETS                                                                                              | MSigDB C2 CGP | 2 | 0 |
| DAIRKEE_CANCER_PRONE_RESPONSE_E2                                                                               | MSigDB C2 CGP | 2 | 0 |
| DAUER_STAT3_TARGETS                                                                                            | MSigDB C2 CGP | 2 | 0 |
| DELASER_MYOD_TARGETS                                                                                           | MSigDB C2 CGP | 2 | 0 |
| DELYS_THYROID_CANCER                                                                                           | MSigDB C2 CGP | 2 | 0 |
| DNA_METABOLIC_PROCESS                                                                                          | MSigDB C5     | 2 | 0 |
| EBAUER_MYOGENIC_TARGETS_OF_PAX3_FOXP1_FUSION                                                                   | MSigDB C2 CGP | 2 | 0 |
| FAELT_B_CLI_WITH_VH3_21                                                                                        | MSigDB C2 CGP | 2 | 0 |
| GAVIN_FOXP3_TARGETS_CLUSTER_P4                                                                                 | MSigDB C2 CGP | 2 | 0 |
| GCM_BAG5                                                                                                       | MSigDB C4     | 2 | 0 |
| GCM_CSNK1A1                                                                                                    | MSigDB C4     | 2 | 0 |
| GCNP_SHH_UP_LATE_V1_UP                                                                                         | MSigDB C6     | 2 | 0 |
| GENTILE_UV_HIGH_DOSE                                                                                           | MSigDB C2 CGP | 2 | 0 |
| GENTILE_UV_RESPONSE_CLUSTER_D4                                                                                 | MSigDB C2 CGP | 2 | 0 |
| GGAACGGGAANY_UNKNOWN                                                                                           | MSigDB C3     | 2 | 0 |
| GNF2_CBPB                                                                                                      | MSigDB C4     | 2 | 0 |
| GNF2_CYP2B6                                                                                                    | MSigDB C4     | 2 | 0 |
| GNF2_DNM1                                                                                                      | MSigDB C4     | 2 | 0 |
| GNF2_GSTM1                                                                                                     | MSigDB C4     | 2 | 0 |
| GNF2_HPN                                                                                                       | MSigDB C4     | 2 | 0 |
| GNF2_HPXC                                                                                                      | MSigDB C4     | 2 | 0 |
| GNF2_JAK1                                                                                                      | MSigDB C4     | 2 | 0 |
| GNF2_LCAT                                                                                                      | MSigDB C4     | 2 | 0 |
| GNF2_LYN                                                                                                       | MSigDB C4     | 2 | 0 |
| GNF2_MYL2                                                                                                      | MSigDB C4     | 2 | 0 |
| GNF2_MYL3                                                                                                      | MSigDB C4     | 2 | 0 |
| GNF2_SERPINE2                                                                                                  | MSigDB C4     | 2 | 0 |
| GNF2_TST                                                                                                       | MSigDB C4     | 2 | 0 |
| GOLDRATH_NAIVE_VS_MEMORY_CD8_TCELL                                                                             | MSigDB C7     | 2 | 0 |
| GSE10325_CD4_TCELL_VS_LUPUS_CD4_TCELL                                                                          | MSigDB C7     | 2 | 0 |
| GSE11057_CD4_CENT_MEM_VS_PBMC                                                                                  | MSigDB C7     | 2 | 0 |
| GSE16266_LPS_VS_HEATSHOCK_AND_LPS_STIM_MEF                                                                     | MSigDB C7     | 2 | 0 |
| GSE17974_IL4_AND_ANTI_IL12_VS_UNTREATED_72H_ACT_CD4_TCELL                                                      | MSigDB C7     | 2 | 0 |
| GSE18791_CTRL_VS_NEWCASTLE_VIRUS_DC_10H                                                                        | MSigDB C7     | 2 | 0 |
| GSE18791_CTRL_VS_NEWCASTLE_VIRUS_DC_6H                                                                         | MSigDB C7     | 2 | 0 |
| GSE18791_UNSTIM_VS_NEWCASTLE_VIRUS_DC_10H                                                                      | MSigDB C7     | 2 | 0 |
| GSE19401_NAIVE_VS_IMMUNIZED_MOUSE_PLN_FOLLICULAR_DC                                                            | MSigDB C7     | 2 | 0 |
| GSE19888_ADENOSINE_A3R_INH_VS_ACT_WITH_INHIBITOR_PRETREATMENT_IN_MAST_CELL                                     | MSigDB C7     | 2 | 0 |
| GSE2128_CTRL_VS_MIMETOP NEGATIVE_SELECTION_DP_THYMOCYTE_NOD                                                    | MSigDB C7     | 2 | 0 |
| GSE21360_SECONDARY_VS_QUATERNARY_MEMORY_CD8_TCELL                                                              | MSigDB C7     | 2 | 0 |
| GSE21546_ELK1_KO_VS_SAP1A_KO_AND_ELK1_KO_DP_THYMOCYTES                                                         | MSigDB C7     | 2 | 0 |
| GSE21670_STAT3_KO_VS_WT_CD4_TCELL_IL6_TREATED_UP                                                               | MSigDB C7     | 2 | 0 |
| GSE21670_UNTREATED_VS_IL6_TREATED_STAT3_KO_CD4_TCELL                                                           | MSigDB C7     | 2 | 0 |
| GSE22140_HEALTHY_VS_ARTHITIC_MOUSE_CD4_TCELL                                                                   | MSigDB C7     | 2 | 0 |



|                                                                             |               |   |   |
|-----------------------------------------------------------------------------|---------------|---|---|
| GSE22601_IMMATURE_CD4_SINGLE_POSITIVE_VS_CD8_SINGLE_POSITIVE_THYMOCYTE      | MSigDB C7     | 2 | 0 |
| GSE22886_CD4_TCELL_VS_BCELL_NAIVE                                           | MSigDB C7     | 2 | 0 |
| GSE22886_CD8_TCELL_VS_BCELL_NAIVE                                           | MSigDB C7     | 2 | 0 |
| GSE22886_DAY0_VS_DAY1_MONOCYTE_IN_CULTURE                                   | MSigDB C7     | 2 | 0 |
| GSE22886_DC_VS_MONOCYTE                                                     | MSigDB C7     | 2 | 0 |
| GSE22886_NAIVE_BCELL_VS_MONOCYTE                                            | MSigDB C7     | 2 | 0 |
| GSE22886_TCELL_VS_BCELL_NAIVE                                               | MSigDB C7     | 2 | 0 |
| GSE22935_WT_VS_MYD88_KO_MACROPHAGE                                          | MSigDB C7     | 2 | 0 |
| GSE23568_CTRL_VS_ID3_TRANSDUCED_CD8_TCELL                                   | MSigDB C7     | 2 | 0 |
| GSE24634_TREG_VS_TCONV_POST_DAYS_IL4_CONVERSION                             | MSigDB C7     | 2 | 0 |
| GSE26030_TH1_VS_TH17_DAYS_POST_POLARIZATION                                 | MSigDB C7     | 2 | 1 |
| GSE26343_UNSTIM_VS_LPS_STIM_NFAT5_KO_MACROPHAGE                             | MSigDB C7     | 2 | 1 |
| GSE26495_NAIVE_VS_PD1LOW_CD8_TCELL                                          | MSigDB C7     | 2 | 1 |
| GSE29618_BCELL_VS_PDC                                                       | MSigDB C7     | 2 | 0 |
| GSE29618_BCELL_VS_PDC_DAY7_FLU_VACCINE                                      | MSigDB C7     | 2 | 1 |
| GSE30971_CTRL_VS_LPS_STIM_MACROPHAGE_WBP7_KO_4H                             | MSigDB C7     | 2 | 0 |
| GSE32164_RESTING_DIFFERENTIATED_VS_ALTERNATIVELY_ACT_M2_MACROPHAGE          | MSigDB C7     | 2 | 0 |
| GSE32533_MIR17_KO_VS_MIR17_OVEREXPRESS_ACT_CD4_TCELL                        | MSigDB C7     | 2 | 0 |
| GSE34006_A2AR_KO_VS_A2AR_AGONIST_TREATED_TREG                               | MSigDB C7     | 2 | 0 |
| GSE34156_TLR1_TLR2_LIGAND_VS_NOD2_AND_TLR1_TLR2_LIGAND_24H_TREATED_MONOCYTE | MSigDB C7     | 2 | 0 |
| GSE36527_CD69_NEG_VS_POS_TREG_CD62L_LOS_KLRG1_NEG                           | MSigDB C7     | 2 | 0 |
| GSE36888_UNTREATED_VS_IL2_TREATED_TCELL_6H                                  | MSigDB C7     | 2 | 0 |
| GSE41087_WT_VS_FOXP3_MUT_ANTI_CD3_CD28_STIM_CD4_TCELL                       | MSigDB C7     | 2 | 0 |
| GSE41176_WT_VS_TAK1_KO_ANTI_IGM_STIM_BCELL_24H                              | MSigDB C7     | 2 | 0 |
| GSE41867_NAIVE_VS_DAY15_ICMV_EFFECTOR_CD8_TCELL                             | MSigDB C7     | 2 | 0 |
| GSE42021_TREG_VS_TCONV_PLN                                                  | MSigDB C7     | 2 | 0 |
| GSE43863_DAY6_LEFT_VS_DAY150_MEM_TH1_CD4_TCELL                              | MSigDB C7     | 2 | 0 |
| GSE5099_CLASSICAL_M1_VS_ALTERNATIVE_M2_MACROPHAGE                           | MSigDB C7     | 2 | 0 |
| GSE7509_DC_VS_MONOCYTE                                                      | MSigDB C7     | 2 | 1 |
| GSE7768_OVA_ALONE_VS_OVA_WITH_LPS_IMMUNIZED_MOUSE_WHOLE_SPLEEN_6H           | MSigDB C7     | 2 | 1 |
| GSE8835_CD4_VS_CD8_TCELL_CLL_PATIENT                                        | MSigDB C7     | 2 | 1 |
| GSE9988_ANTI_TREM1_VS_CTRL_TREATED_MONOCYTES                                | MSigDB C7     | 2 | 1 |
| GSE9988_ANTI_TREM1_VS_VEHICLE_TREATED_MONOCYTES                             | MSigDB C7     | 2 | 0 |
| GSE9988_LOW_LPS_VS_CTRL_TREATED_MONOCYTE                                    | MSigDB C7     | 2 | 0 |
| GSE9988_LPS_VS_CTRL_TREATED_MONOCYTE                                        | MSigDB C7     | 2 | 0 |
| HADDAD_T_LYMPHOCTYTE_AND_NK_PROGENITOR                                      | MSigDB C2 CGP | 2 | 0 |
| HALLMARK_MTORC1_SIGNALING                                                   | MSigDB C7     | 2 | 0 |
| HOEGERKORP_CD44_TARGETS_DIRECT                                              | MSigDB C2 CGP | 2 | 1 |
| HOEGERKORP_CD44_TARGETS_TEMPORAL                                            | MSigDB C2 CGP | 2 | 1 |
| HOLLEMAN_VINCISTINE_RESISTANCE_B_ALL                                        | MSigDB C2 CGP | 2 | 1 |
| HORIUCHI_WTAP_TARGETS                                                       | MSigDB C2 CGP | 2 | 1 |
| HOXA9_DN.V1                                                                 | MSigDB C2 CGP | 2 | 1 |
| INFLAMMATORY_RESPONSE                                                       | MSigDB C5     | 2 | 1 |
| KEGG_VALINE_LEUCINE_AND_ISOLEUCINE_DEGRADATION                              | MSigDB C2 CP  | 2 | 1 |
| KEGG_VIRAL_MYOCARDITIS                                                      | MSigDB C2 CP  | 2 | 0 |
| KIM_ALL_DISORDERS_DURATION_CORR                                             | MSigDB C2 CGP | 2 | 0 |
| LEE_LIVER_CANCER                                                            | MSigDB C2 CGP | 2 | 0 |
| LEE_LIVER_CANCER_SURVIVAL                                                   | MSigDB C2 CGP | 2 | 0 |
| LIN_APC_TARGETS                                                             | MSigDB C2 CGP | 2 | 0 |
| LINDGREN_BLADDER_CANCER_CLUSTER_1                                           | MSigDB C2 CGP | 2 | 0 |
| LJI_THYROID_CANCER_CLUSTER_3                                                | MSigDB C2 CGP | 2 | 0 |
| MA_MYELOID_DIFFERENTIATION                                                  | MSigDB C2 CGP | 2 | 0 |
| MARSON_FOXP3_TARGETS_STIMULATED                                             | MSigDB C2 CGP | 2 | 0 |
| MITOTIC_CELL_CYCLE_CHECKPOINT                                               | MSigDB C5     | 2 | 0 |
| MODULE_117                                                                  | MSigDB C4     | 2 | 0 |
| MODULE_149                                                                  | MSigDB C4     | 2 | 0 |
| MODULE_15                                                                   | MSigDB C4     | 2 | 0 |
| MODULE_177                                                                  | MSigDB C4     | 2 | 0 |
| MODULE_201                                                                  | MSigDB C4     | 2 | 0 |
| MODULE_202                                                                  | MSigDB C4     | 2 | 0 |
| MODULE_212                                                                  | MSigDB C4     | 2 | 0 |
| MODULE_23                                                                   | MSigDB C4     | 2 | 1 |
| MODULE_397                                                                  | MSigDB C4     | 2 | 1 |
| MODULE_484                                                                  | MSigDB C4     | 2 | 1 |
| MORF_REV3L                                                                  | MSigDB C4     | 2 | 0 |
| MORF_TPR                                                                    | MSigDB C4     | 2 | 0 |
| MORI_MATURE_B_LYMPHOCTYTE                                                   | MSigDB C2 CGP | 2 | 1 |
| MULLIGHAN_ML1_SIGNATURE_1                                                   | MSigDB C2 CGP | 2 | 1 |
| MYOSIN_COMPLEX                                                              | MSigDB C5     | 2 | 0 |
| NIELSEN_MALIGNANT_FIBROUS_HISTIOCYTOMA                                      | MSigDB C2 CGP | 2 | 1 |
| NIKOLSKY_BREAST_CANCER_15Q26_AMPlicON                                       | MSigDB C2 CGP | 2 | 1 |
| ORGANELLE_INNER_MEMBRANE                                                    | MSigDB C5     | 2 | 1 |
| OXFORD_RALA_OR_RALB_TARGETS                                                 | MSigDB C2 CGP | 2 | 1 |
| PARK_APL_PATHOGENESIS                                                       | MSigDB C2 CGP | 2 | 1 |
| PARK_TRETINOLIN_RESPONSE_AND_PML_RARA_FUSION                                | MSigDB C2 CGP | 2 | 1 |
| PATIL_LIVER_CANCER                                                          | MSigDB C2 CGP | 2 | 1 |
| PELLICCIOTTA_HDAC_IN_ANTIGEN_PRESENTATION                                   | MSigDB C2 CGP | 2 | 1 |
| PHONS_TNF_TARGETS                                                           | MSigDB C2 CGP | 2 | 1 |
| PID_CRCR4_PATHWAY                                                           | MSigDB C2 CP  | 2 | 1 |
| PLASARI_TGFBI_TARGETS_10HR                                                  | MSigDB C2 CGP | 2 | 0 |
| RADAEVA_RESPONSE_TO_JF1                                                     | MSigDB C2 CGP | 2 | 0 |
| REACTOME_ABORTIVE_ELONGATION_OF_HIV1_TRANSCRIPT_IN_THE_ABSENCE_OF_TAT       | MSigDB C2 CP  | 2 | 0 |
| REACTOME_AMYLOIDS                                                           | MSigDB C2 CP  | 2 | 0 |
| REACTOME_BIOLOGICAL_OXIDATIONS                                              | MSigDB C2 CP  | 2 | 0 |
| REACTOME_CHEMOKINE_RECEPTORS_BIND_CHEMOKINES                                | MSigDB C2 CP  | 2 | 0 |
| REACTOME_CLASS_A1_RHODOPSIN_LIKE_RECEPTORS                                  | MSigDB C2 CP  | 2 | 0 |
| REACTOME_DEFENSINS                                                          | MSigDB C2 CP  | 2 | 0 |
| REACTOME_ER_PHAGOSOME_PATHWAY                                               | MSigDB C2 CP  | 2 | 0 |
| REACTOME_GENERIC_TRANSCRIPTION_PATHWAY                                      | MSigDB C2 CP  | 2 | 0 |
| REACTOME_IL2_SIGNALING                                                      | MSigDB C2 CP  | 2 | 0 |
| REACTOME_INNATE_IMMUNE_SYSTEM                                               | MSigDB C2 CP  | 2 | 0 |
| REACTOME_NEURONAL_SYSTEM                                                    | MSigDB C2 CP  | 2 | 0 |
| REACTOME_SIGNALING_BY_ILS                                                   | MSigDB C2 CP  | 2 | 1 |
| RESPONSE_TO_EXTERNAL_STIMULUS                                               | MSigDB C5     | 2 | 1 |
| RICKMAN_TUMOR_DIFFERENTIATED_WELL_VS_MODERATELY                             | MSigDB C2 CGP | 2 | 1 |
| SABATES_COLORECTAL_ADENOMA                                                  | MSigDB C2 CGP | 2 | 0 |
| SANSOM_APC_TARGETS                                                          | MSigDB C2 CGP | 2 | 1 |
| SARCOMERE                                                                   | MSigDB C5     | 2 | 1 |
| SCHLINGEMANN_SKIN_CARCINOGENESIS_TPA                                        | MSigDB C2 CGP | 2 | 1 |
| SCIAN_CELL_CYCLE_TARGETS_OF_TP53_AND_TP73                                   | MSigDB C2 CGP | 2 | 1 |
| SONG_TARGETS_OF_I886_CMV_PROTEIN                                            | MSigDB C2 CGP | 2 | 1 |
| SWEET_KRAS_TARGETS                                                          | MSigDB C2 CGP | 2 | 1 |
| TENEDINI_MEGAKARYOCYTE_MARKERS                                              | MSigDB C2 CGP | 2 | 1 |
| TGFB                                                                        | Speed         | 2 | 1 |
| TIAN_TNF_SIGLING_VIA_NFKB                                                   | MSigDB C2 CGP | 2 | 1 |
| TSENG_IRS1_TARGETS                                                          | MSigDB C2 CGP | 2 | 1 |
| VSGABP_B                                                                    | MSigDB C3     | 2 | 1 |
| WILCOX_RESPONSE_TO_PROGESTERONE                                             | MSigDB C2 CGP | 2 | 1 |
| WU_HBX_TARGETS_1                                                            | MSigDB C2 CGP | 2 | 0 |
| XU_HGF_TARGETS_INDUCED_BY_AKT1_48HR                                         | MSigDB C2 CGP | 2 | 0 |
| ZWANG_CLASS_2_TRANSIENTLY_INDUCED_BY_EGF                                    | MSigDB C2 CGP | 2 | 0 |
| BLUM_RESPONSE_TO_SALIRASIB                                                  | MSigDB C2 CGP | 2 | 1 |
| BOQUEST_STEM_CELL                                                           | MSigDB C2 CGP | 2 | 1 |
| BOYAUIT_LIVER_CANCER_SUBCLASS_G3                                            | MSigDB C2 CGP | 2 | 1 |
| CASORELLI_ACUTE_PROMYELOCYTIC_LEUKEMIA                                      | MSigDB C2 CGP | 2 | 1 |
| CHARAFE_BREAST_CANCER_BASAL_VS_MESENCHYMAL                                  | MSigDB C2 CGP | 2 | 1 |
| CHIANG_LIVER_CANCER_SUBCLASS_PROLIFERATION                                  | MSigDB C2 CGP | 2 | 1 |
| CHIANG_LIVER_CANCER_SUBCLASS_UNNOTATED                                      | MSigDB C2 CGP | 2 | 1 |
| chr19p13                                                                    | MSigDB C1     | 2 | 1 |
| chr1q21                                                                     | MSigDB C1     | 2 | 1 |
| CHROMOSOME_SEGREGATION                                                      | MSigDB C5     | 2 | 1 |
| chrp11                                                                      | MSigDB C1     | 2 | 1 |
| chrx28                                                                      | MSigDB C1     | 2 | 1 |
| CIT20_DN                                                                    | CIT           | 2 | 1 |
| CIT6_DN                                                                     | CIT           | 2 | 1 |
| DUTERTRE ESTRADIOL_RESPONSE_24HR                                            | MSigDB C2 CGP | 2 | 1 |
| FARMER_BREAST_CANCER_CLUSTER_4                                              | MSigDB C2 CGP | 2 | 1 |
| FOURNIER_ACIR_DEVELOPMENT_LATE_2                                            | MSigDB C2 CGP | 2 | 1 |

|                                                            |               |   |   |
|------------------------------------------------------------|---------------|---|---|
| FRASOR_RESPONSE_TO_SERM_OR_FULVESTRANT                     | MSigDB C2 CGP | 2 | 1 |
| GAUSSMANN_MLL_AF4_FUSION_TARGETS_E                         | MSigDB C2 CGP | 2 | 1 |
| GCCATNTTG_VSY1_Q6                                          | MSigDB C4     | 2 | 1 |
| GCM_GSPT1                                                  | MSigDB C4     | 2 | 1 |
| GCM_HBP1                                                   | MSigDB C4     | 2 | 1 |
| GCM_MLL                                                    | MSigDB C4     | 2 | 1 |
| GCM_MYST2                                                  | MSigDB C4     | 2 | 1 |
| GCM_NF2                                                    | MSigDB C4     | 2 | 1 |
| GNF2_CD48                                                  | MSigDB C4     | 2 | 1 |
| GNF2_CDH3                                                  | MSigDB C4     | 2 | 1 |
| GNF2_DEK                                                   | MSigDB C4     | 2 | 1 |
| GNF2_DENR                                                  | MSigDB C4     | 2 | 1 |
| GNF2_PPP6C                                                 | MSigDB C4     | 2 | 1 |
| GNF2_SP11                                                  | MSigDB C4     | 2 | 1 |
| GNF2_SPINK1                                                | MSigDB C4     | 2 | 1 |
| GNF2_SRR1B                                                 | MSigDB C4     | 2 | 1 |
| GOLDRATH_EFF_VS_MEMORY_CD8_TCELL                           | MSigDB C2 CGP | 2 | 1 |
| GRAHAM_CML_QUIESCENT_VS_NORMAL_QUIESCENT                   | MSigDB C2 CGP | 2 | 1 |
| GSE11386_NAIVE_VS_MEMORY_BCELL                             | MSigDB C7     | 2 | 1 |
| GSE13485_DAY1_VS_DAY7_YF17D_VACCINE_PBMIC                  | MSigDB C7     | 2 | 1 |
| GSE13485_PRE_VS_POST_YF17D_VACCINATION_PBMIC               | MSigDB C7     | 2 | 1 |
| GSE13547_2H_VS_12_H_ANTI_IGM_STIM_ZFX_KO_BCELL             | MSigDB C7     | 2 | 1 |
| GSE17301_ACD3_ACD28_VS_ACD3_ACD28_AND_IFNA5_STIM_CD8_TCELL | MSigDB C7     | 2 | 1 |
| GSE18791_CTRL_VS_NEWCASTLE_VIRUS_DC_8H                     | MSigDB C7     | 2 | 1 |
| GSE18893_TCONV_VS_TREG_24H_TNF_STIM                        | MSigDB C7     | 2 | 1 |
| GSE21546_WT_VS_SAP1A_KO_DP_THYMOCYTES                      | MSigDB C7     | 2 | 1 |
| GSE22886_UNSTIM_VS_IL15_STIM_NKCELL                        | MSigDB C7     | 2 | 1 |
| GSE22886_UNSTIM_VS_IL2_STIM_NKCELL                         | MSigDB C7     | 2 | 1 |
| GSE2405_S_AUREUS_VS_UNTREATED_NEUTROPHIL                   | MSigDB C7     | 2 | 1 |
| GSE29614_CTRL_VS_DAY7_TIV_FLU_VACCINE_PBMIC                | MSigDB C7     | 2 | 1 |
| GSE3337_4H_VS_16H_IFNG_IN_CD8POS_DC                        | MSigDB C7     | 2 | 1 |
| GSE36476_CTRL_VS_TSST_ACT_40H_MEMORY_CD4_TCELL_YOUNG       | MSigDB C7     | 2 | 1 |
| GSE36826_NORMAL_VS_STAPH_AUREUS_INF_IL1R_KO_SKIN           | MSigDB C7     | 2 | 1 |
| GSE40274_CTRL_VS_FOXP3_TRANSDUCED_ACTIVATED_CD4_TCELL      | MSigDB C7     | 2 | 1 |
| GSE45365_HEALTHY_VS_MCMV_INFECTION_CD11B_DC                | MSigDB C7     | 2 | 1 |
| GSE6259_3D1_POS_DC_VS_CD4_TCELL                            | MSigDB C7     | 2 | 1 |
| GSE9988_ANTI_TREM1_VS_LPS_MONOCYTE                         | MSigDB C7     | 2 | 1 |
| ICHIBA_GRAFT_VERSUS_HOST_DISEASE_35D                       | MSigDB C2 CGP | 2 | 1 |
| KAUFFMANN_D_REPLICATION_GENES                              | MSigDB C2 CGP | 2 | 1 |
| KEGG_AMINOACYL_TRNA_BIOSYNTHESIS                           | MSigDB C2 CP  | 2 | 1 |
| KIM_GLS2_TARGETS                                           | MSigDB C2 CGP | 2 | 1 |
| LIEN_BREAST_CARCINOMA_METAPLASTIC                          | MSigDB C2 CGP | 2 | 1 |
| LIM_MAMMARY_LUMIL_MATURE                                   | MSigDB C2 CGP | 2 | 1 |
| LINDGREN_BLADDER_CANCER_CLUSTER_3                          | MSigDB C2 CGP | 2 | 1 |
| LINDSTEDT_DENDRITIC_CELL_MATURATION_D                      | MSigDB C2 CGP | 2 | 1 |
| LIU_VAV3_PROSTATE_CARCINOGENESIS                           | MSigDB C2 CGP | 2 | 1 |
| MODULE_11                                                  | MSigDB C4     | 2 | 1 |
| MODULE_12                                                  | MSigDB C4     | 2 | 1 |
| MODULE_17                                                  | MSigDB C4     | 2 | 1 |
| MODULE_2                                                   | MSigDB C4     | 2 | 1 |
| MODULE_297                                                 | MSigDB C4     | 2 | 1 |
| MODULE_357                                                 | MSigDB C4     | 2 | 1 |
| MORF_BECN1                                                 | MSigDB C4     | 2 | 1 |
| MORF_PAPSS1                                                | MSigDB C4     | 2 | 1 |
| MORF_SP3                                                   | MSigDB C4     | 2 | 1 |
| NABA_ECM_GLYCOPROTEINS                                     | MSigDB C2 CP  | 2 | 1 |
| ONDER_CDH1_TARGETS_2                                       | MSigDB C2 CGP | 2 | 1 |
| PENG_LEUCEMIA_DEPRIVATION                                  | MSigDB C2 CGP | 2 | 1 |
| POMEROY_MEDULLOBLASTOMA_PROGNOSIS                          | MSigDB C2 CGP | 2 | 1 |
| PYEON_HPV_POSITIVE_TUMORS                                  | MSigDB C2 CGP | 2 | 1 |
| REACTOME_LAGGING_STRAND_SYNTHESIS                          | MSigDB C2 CP  | 2 | 1 |
| REACTOME_M_G1_TRANSITION                                   | MSigDB C2 CP  | 2 | 1 |
| REACTOME_MRNA_PROCESSING                                   | MSigDB C2 CP  | 2 | 1 |
| REACTOME_MUSCLE_CONTRACTION                                | MSigDB C2 CP  | 2 | 1 |
| REACTOME_ORC1_REMOVAL_FROM_CHROMATIN                       | MSigDB C2 CP  | 2 | 1 |
| REACTOME_PHOSPHORYLATION_OF_THE_APC_C                      | MSigDB C2 CP  | 2 | 1 |
| REACTOME_SYNTHESIS_OF_DNA                                  | MSigDB C2 CP  | 2 | 1 |
| REACTOME_UNWINDING_OF_DNA                                  | MSigDB C2 CP  | 2 | 1 |
| SARRIO_EPITHELIAL_MESENCHYMAL_TRANSITION                   | MSigDB C2 CGP | 2 | 1 |
| SISTER_CHROMATID_SEGREGATION                               | MSigDB C5     | 2 | 1 |
| SMALL_NUCLEAR_RIBONUCLEOPROTEIN_COMPLEX                    | MSigDB C5     | 2 | 1 |
| SMID_BREAST_CANCER_LUMIL_B                                 | MSigDB C2 CGP | 2 | 1 |
| WHITFIELD_CELL_CYCLE_G2_M                                  | MSigDB C2 CGP | 2 | 1 |

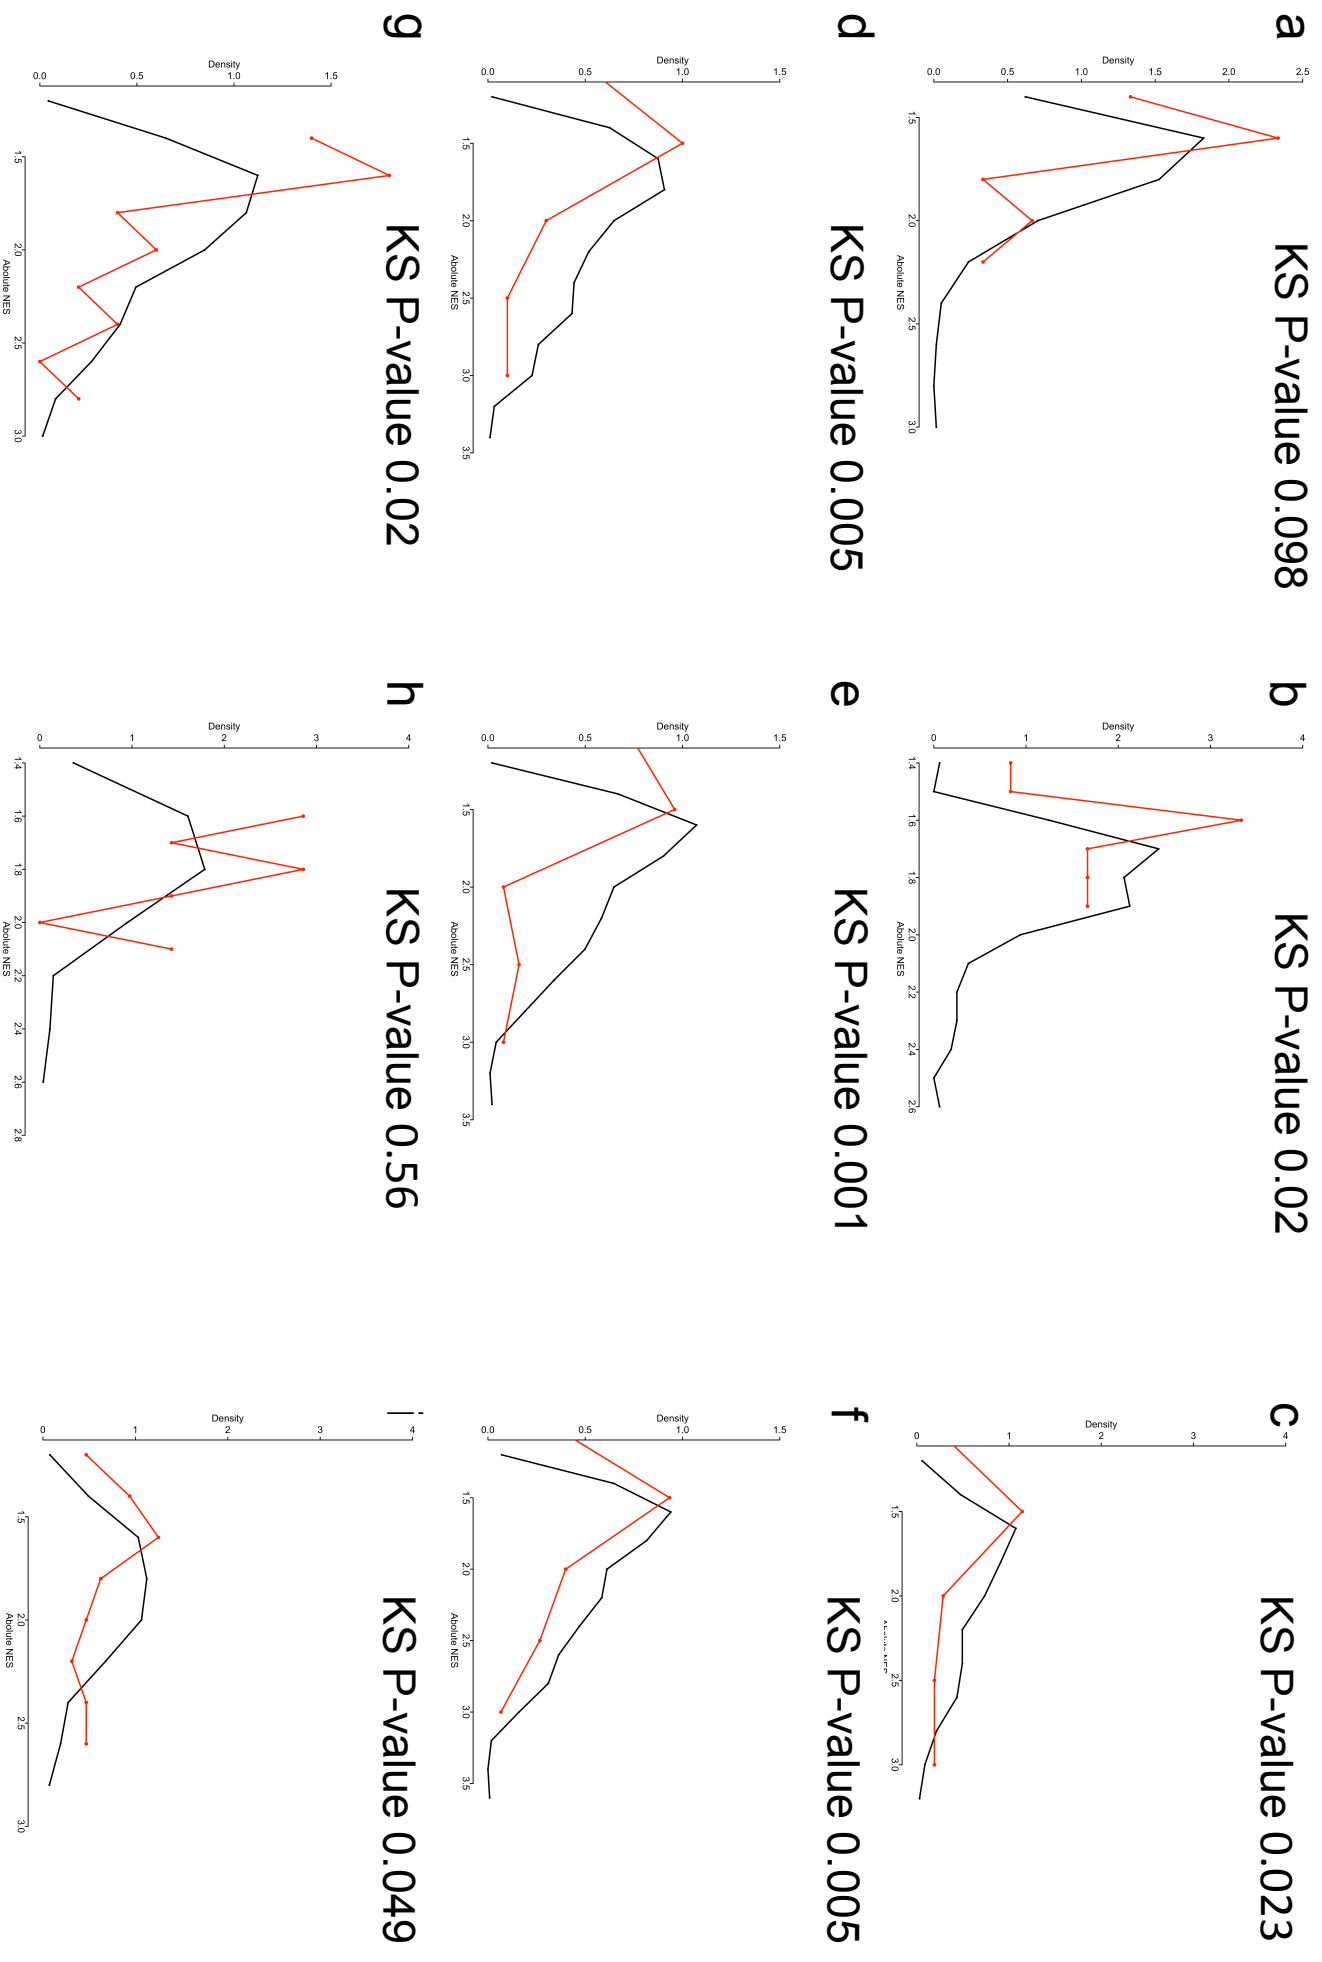

**Figure S1.** Comparison GSEA absolute NES values for the informative GSEA significant (black) vs. Hallmark GSEA significant (red) in (a) colorectal cancer KRAS mutated vs. wild type; (b-c) colon cancer metastatic vs. primary in RNA-seq and microarray; (d-g) tumor vs. normal in cervix, colon, gastric and lung and (h-i) breast cancer late vs early stage in TCGA and METABRIC, respectively.

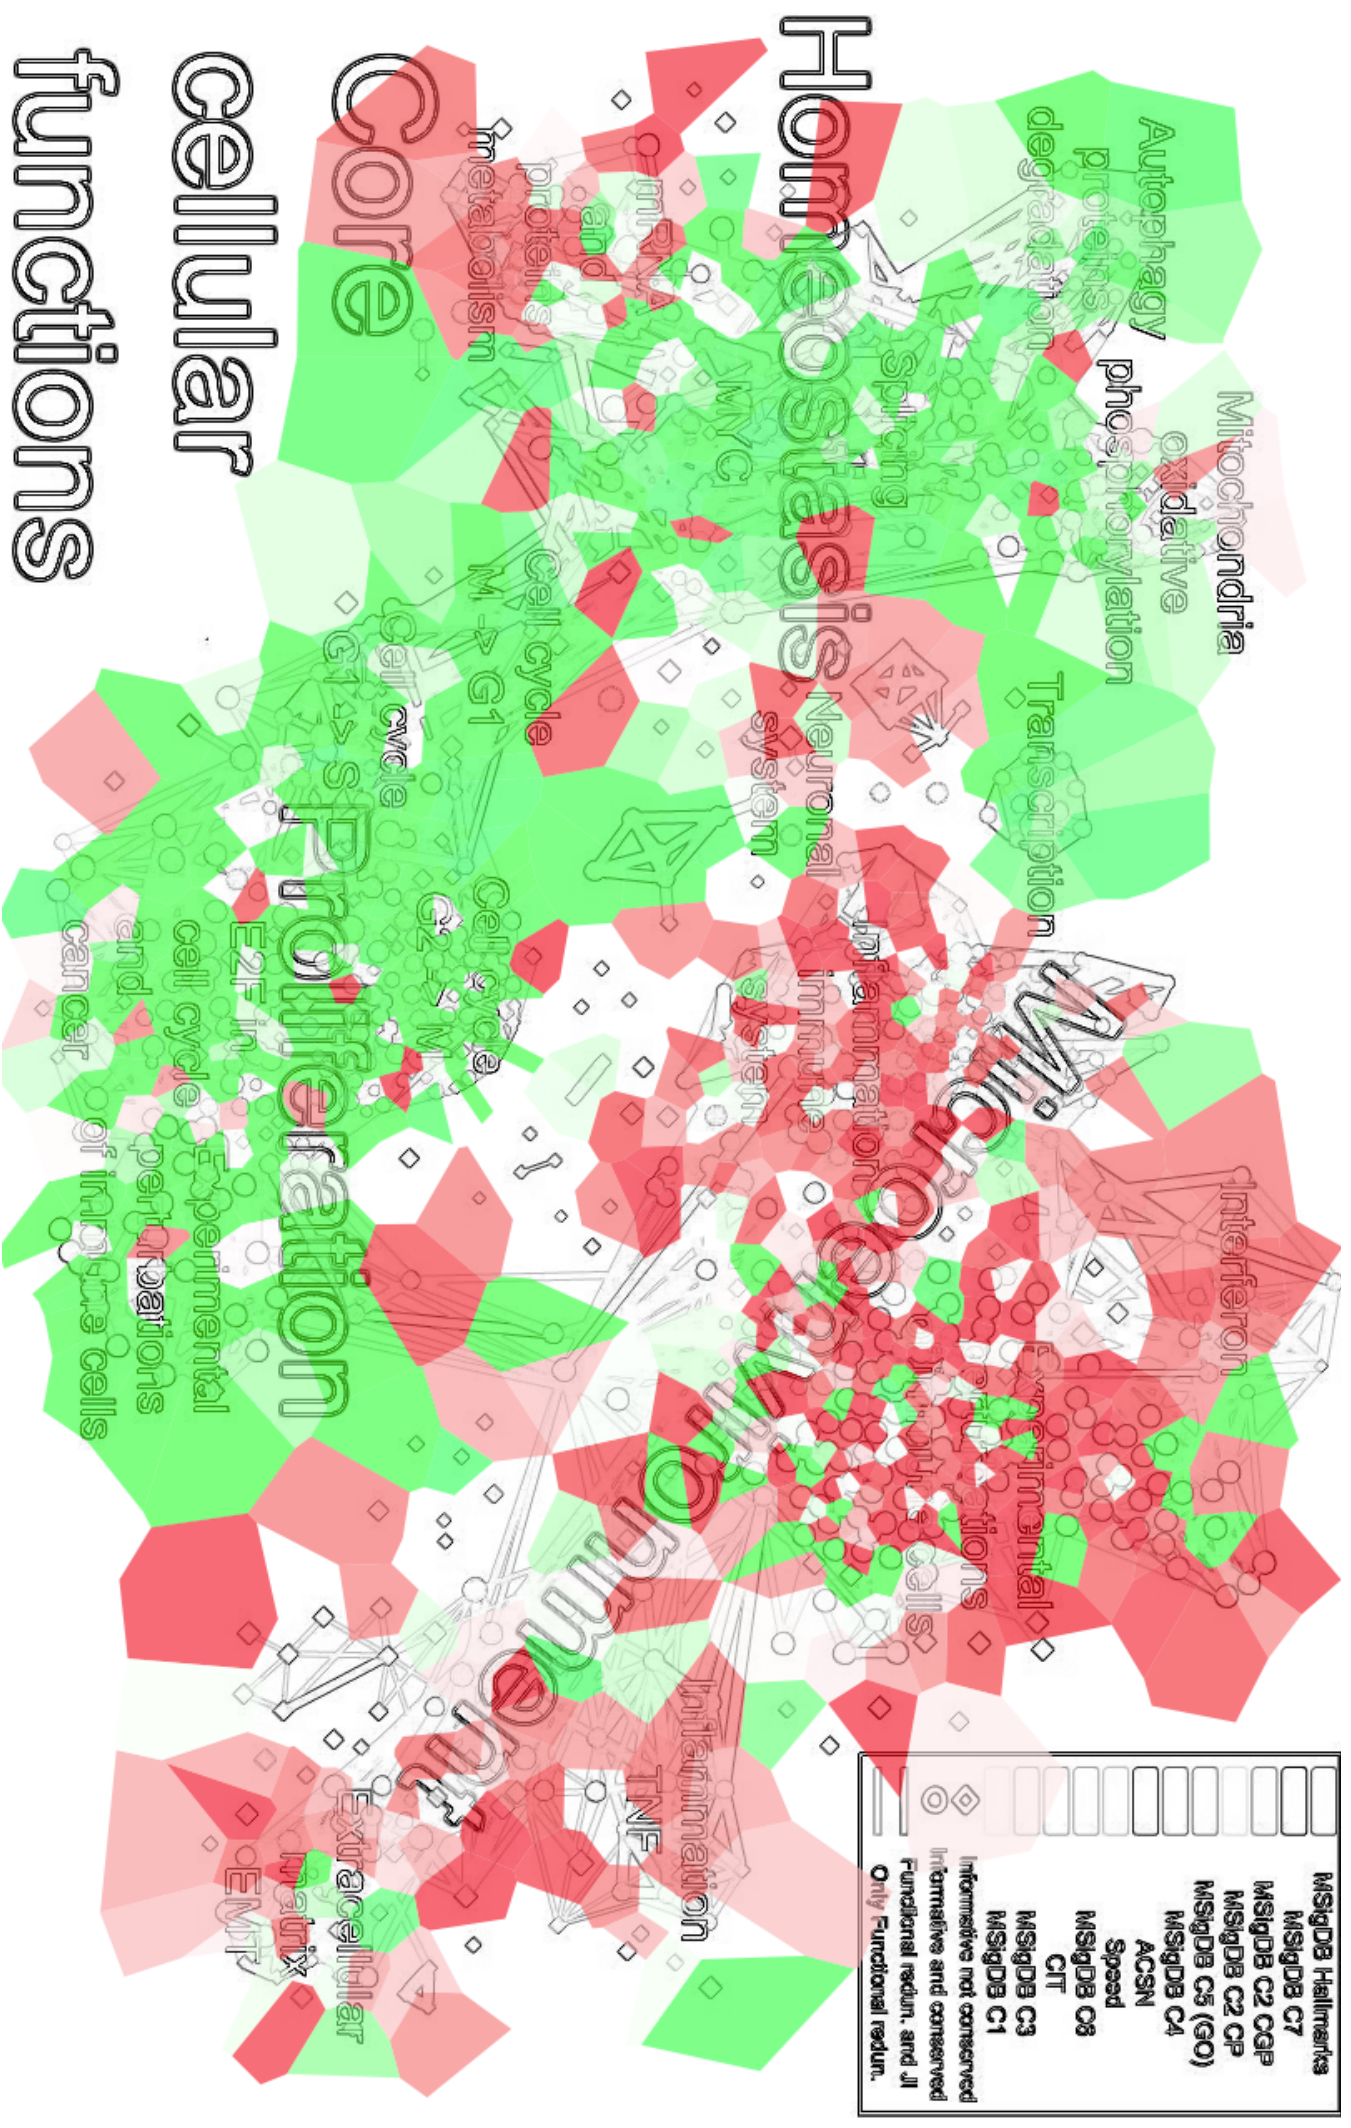

**Figure S2.** Fold changes of ROMA activity on the expression profiling of human CD4+ T cell during differentiation induction plotted on InfoSigMap. Red, and green indicate upregulation and downregulation, respectively.

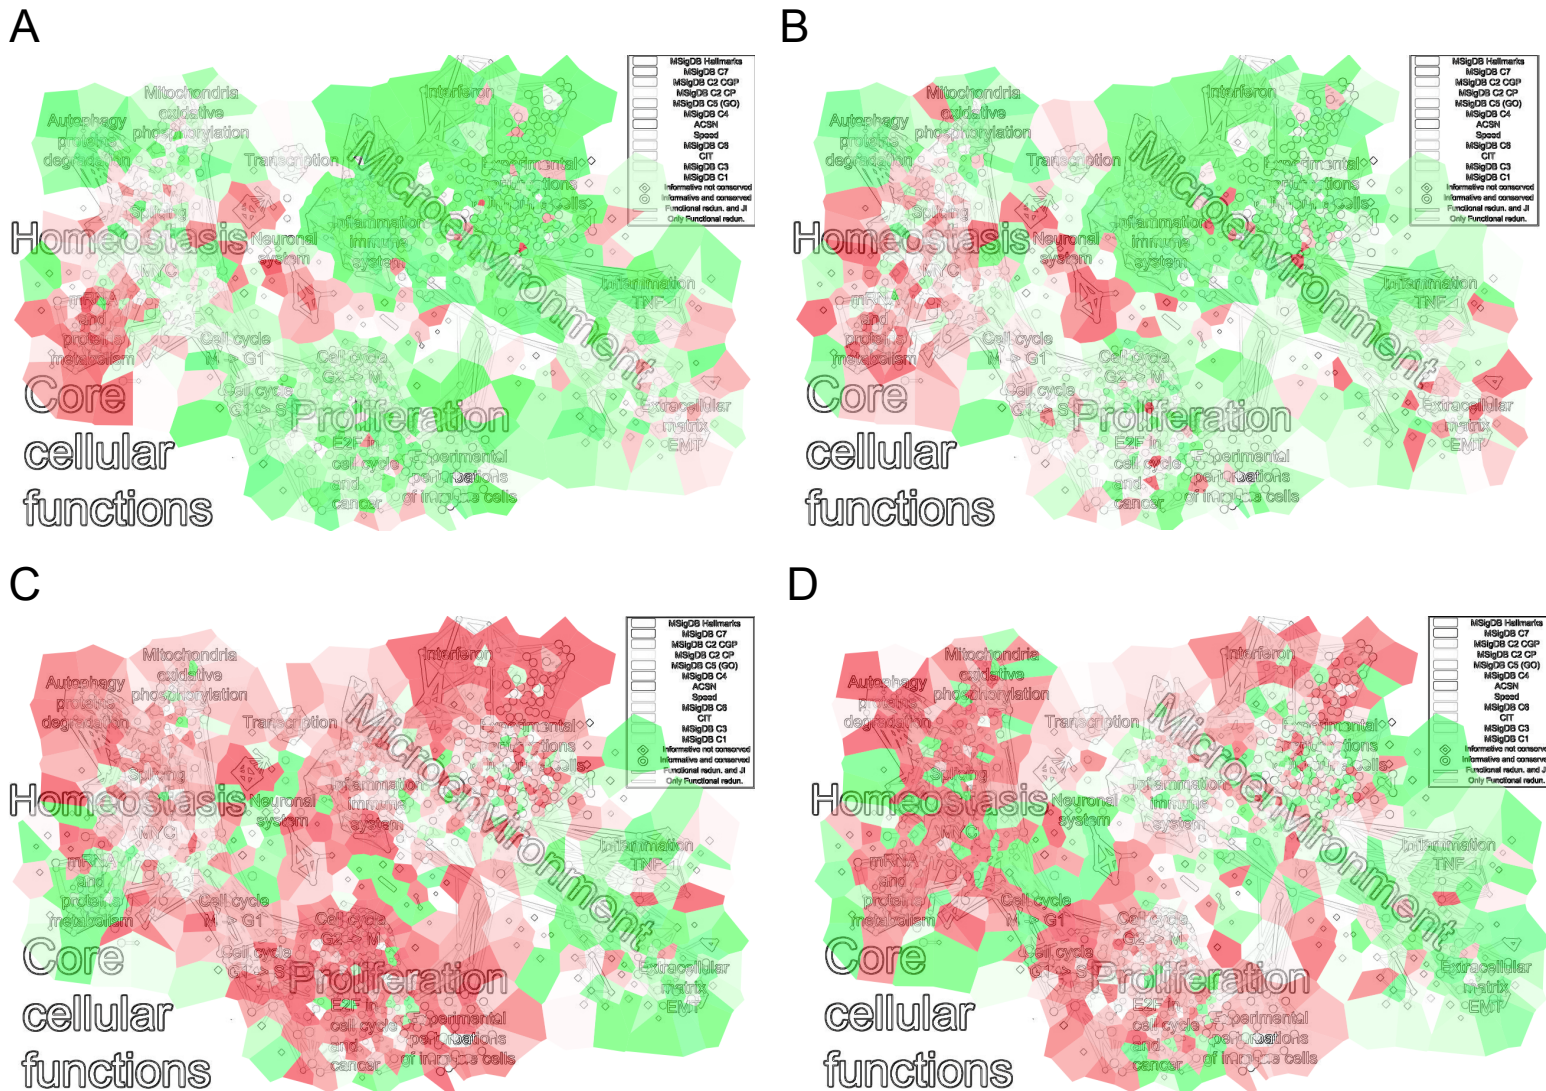

**Figure S3.** The significant fold-changes resulting from the differential ROMA analysis (see Methods) are plotted on the top of the map according to a heatmap coloring highlighting up- (red) and down-regulated (green) gene signatures. The plots are organized as follows : (a) colon cancer metastatic vs. primary in TCGA microarray; (a) colon cancer metastatic vs. primary in TCGA RNA-seq; (c) breast cancer late vs early stage in TCGA and (d) breast cancer late vs early in METABRIC.
